# Supplementary material for: Photophysical properties of di-Schiff bases: evaluating the synergistic effect of non-covalent interactions and alkyl spacers in enhanced emissions of solids
Source: Royal Society of Chemistry journal article supplement (doi:10.1039/c6ra08582b), 2016-01-01

## Photophysical Properties of Di-Schiff Bases: Evaluating the Synergistic Effect of Non Covalent Interactions and Alkyl Spacer in Enhanced Emissions in Solids

*Moyna Das, Fayaz Baig and Madhushree Sarkar\**

*Department of Chemistry, Birla Institute of Technology and Science, Pilani, Pilani Campus Rajasthan 333031, India; Email: msarkar@bits-pilani.ac.in Phone: +91-1596-515679; Fax: +91-1596-244183*

### SUPPORTING INFORMATION

**General:** Infra Red Spectra were taken in FTIR ABB Bomen MB-3000. UV-Visible Spectra and Fluorescence Spectra were taken in Shimadzu spectrophotometer with model UV-2450 and Fluorimax-4 0426C0809, respectively. Proton and Carbon-13 Nuclear Magnetic Resonance ( $^1\text{H}$  NMR and  $^{13}\text{C}$  NMR) spectra were recorded on a 400 MHz spectrophotometer (Bruker). Powder X-Ray Diffraction (XRD) were recorded with a Rigaku miniflex II,  $\lambda = 1.54$ , Cu  $K\alpha$ .

**Figure S1:** IR of L1a

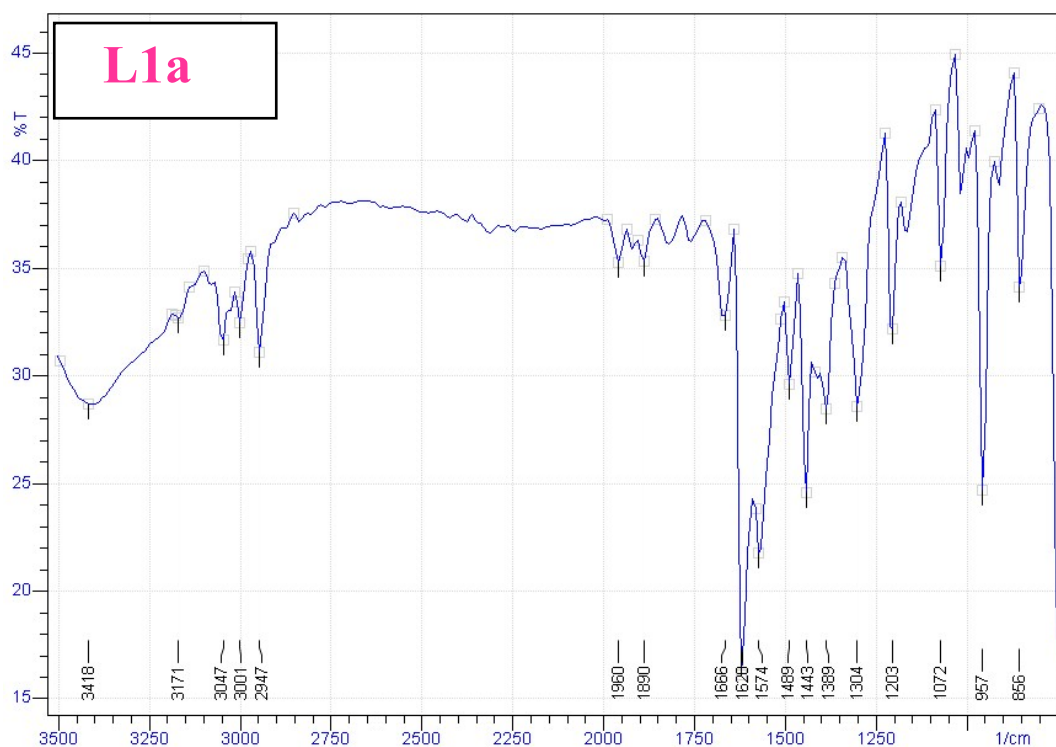

**IR (cm<sup>-1</sup> KBr pellet):** 3418(w), 3171(w), 3047(w), 3001(w), 2947(m), 1666(m), 1628(vs), 1574(w), 489(w), 1443(m), 1304(w), 1203(w), 957(m), 856(w).

Figure S2:  $^1\text{H}$  NMR of L1a

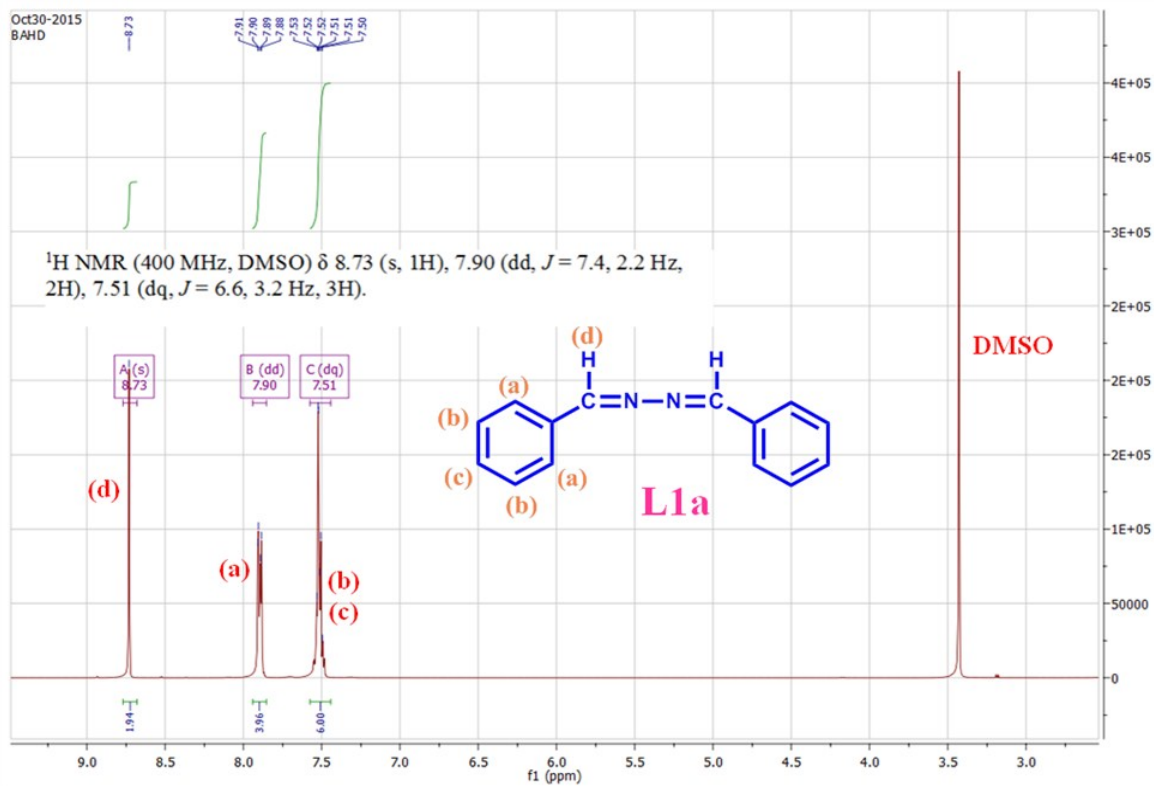

Figure S3:  $^{13}\text{C}$  NMR of L1a

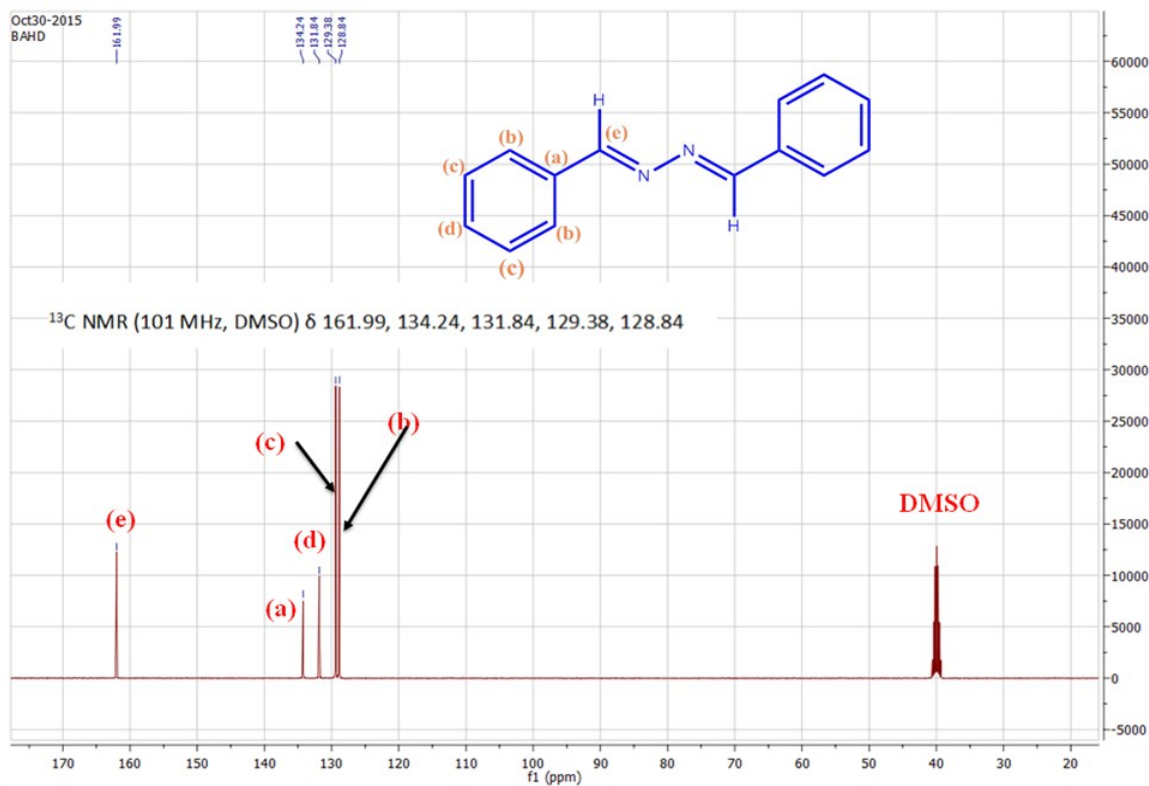

Figure S4: IR of L1b

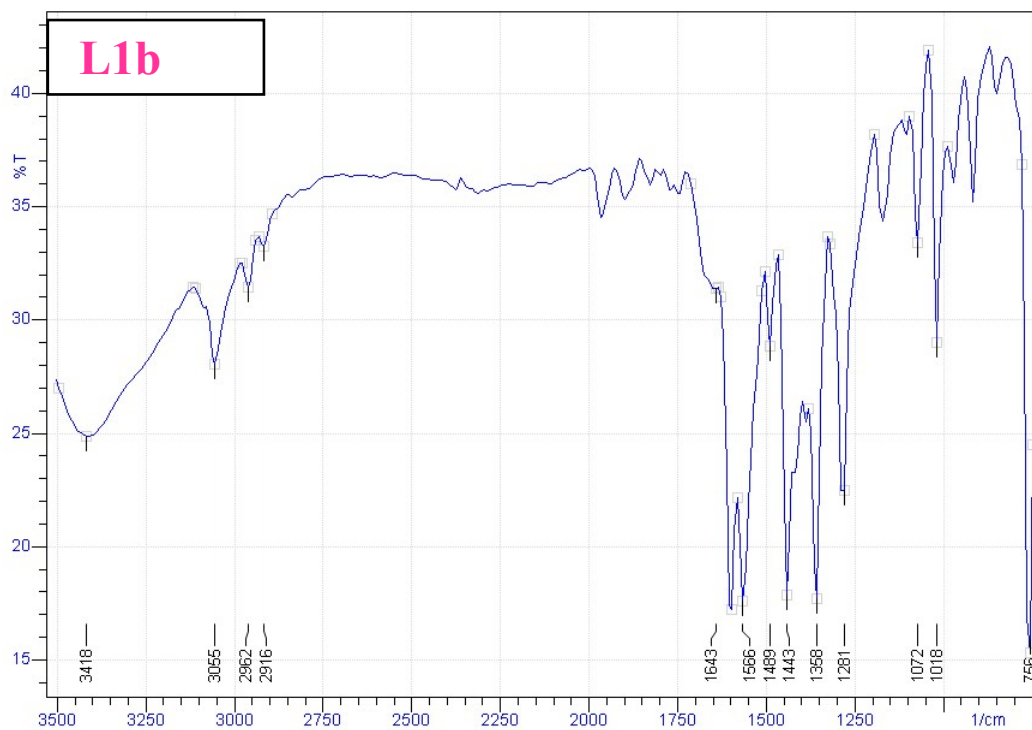

IR (cm<sup>-1</sup> KBr pellet): 3418(m), 3055(m), 2962(m), 2916(w), 1643(vs), 1566(vs), 1489(w), 1443(vs), 1358(vs), 1281(s), 1072(m), 1018(m), 756(vs).

Figure S5: <sup>1</sup>H NMR of L1b

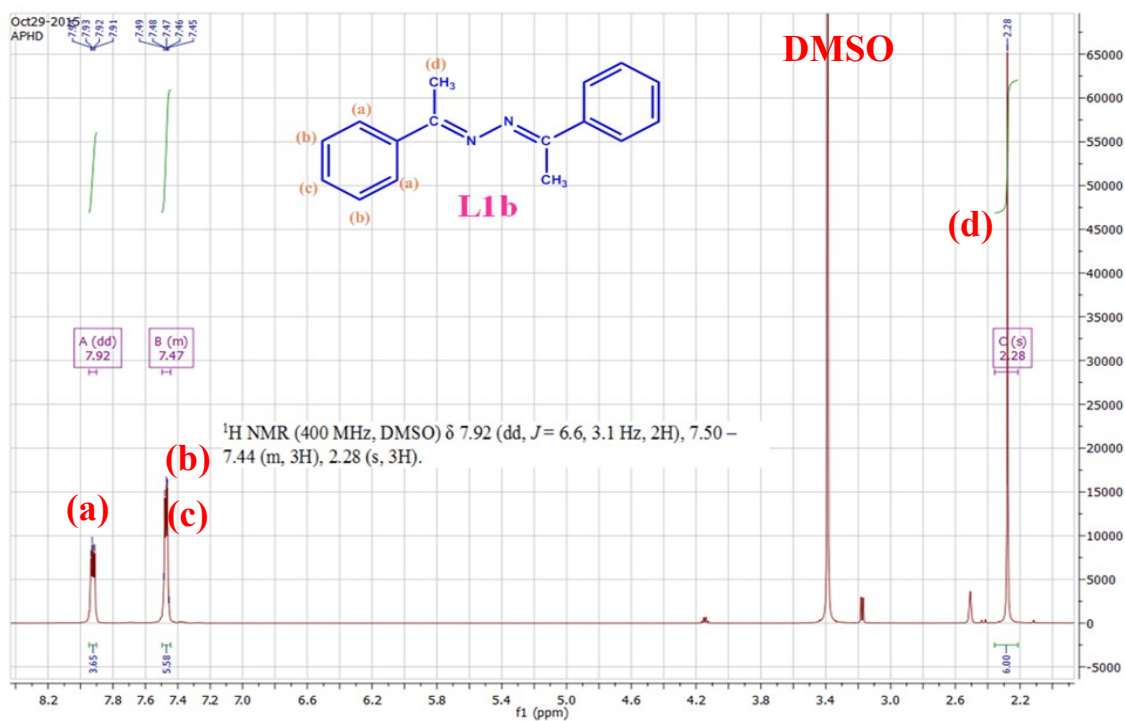

Figure S6:  $^{13}\text{C}$  NMR of L1b

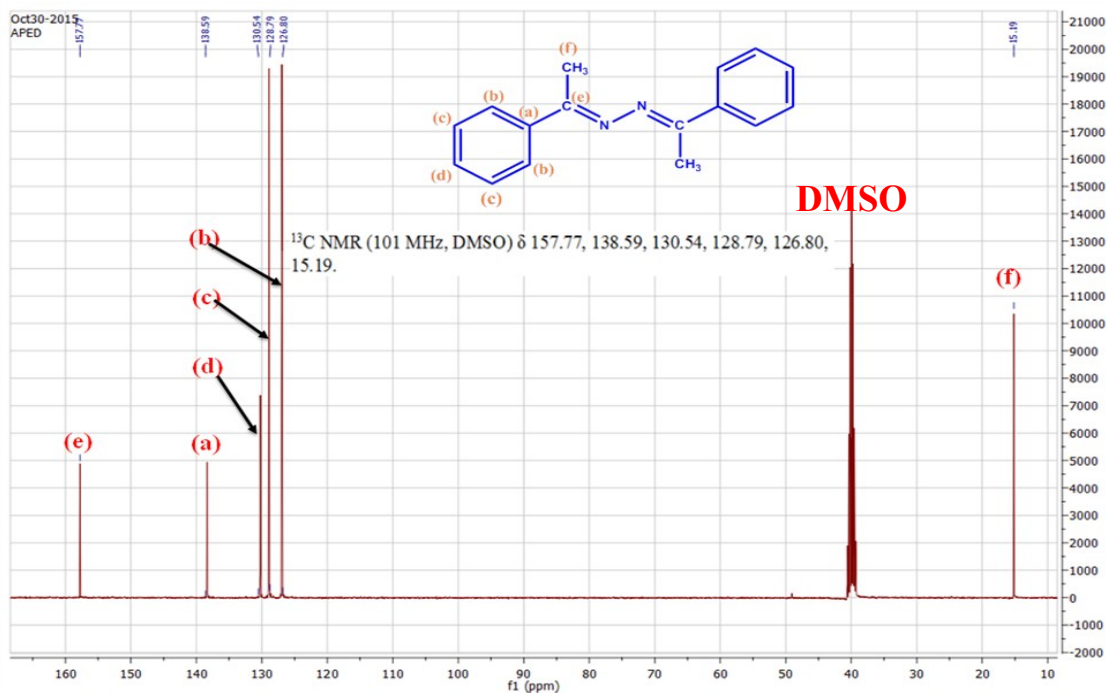

Figure S7: IR of L2a

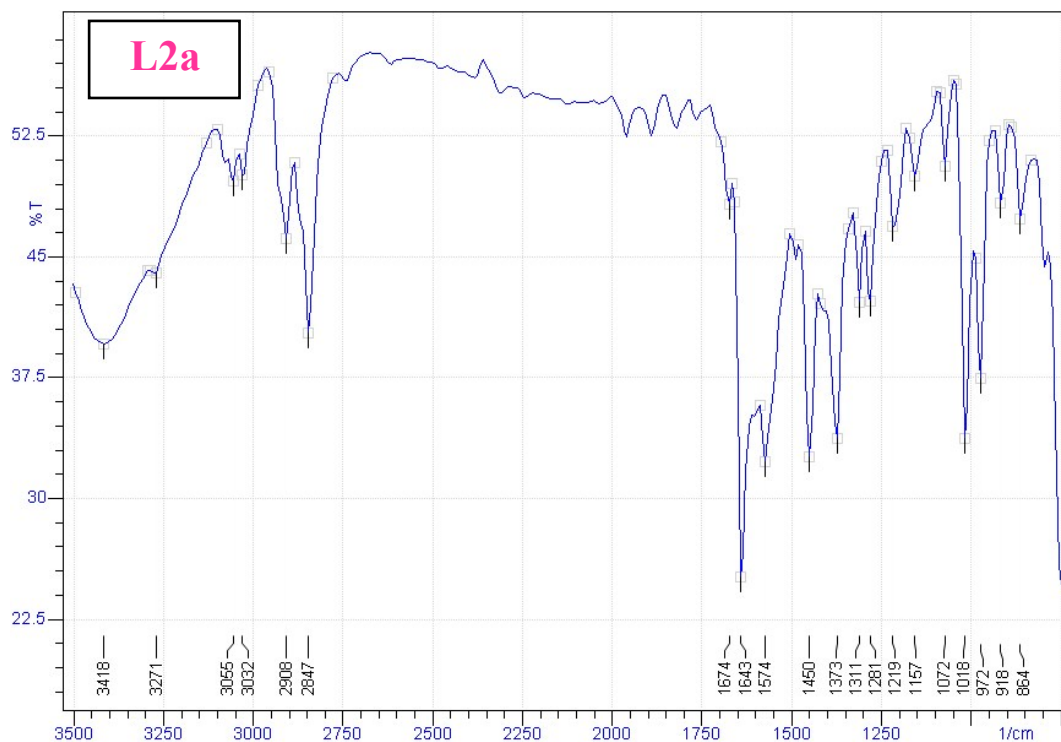

IR ( $\text{cm}^{-1}$  KBr pellet): 3418(m), 3271(w), 3055(w), 3032(w), 2908(w), 2843(m), 1674(w), 1643(vs), 1574(w), 1450(m), 1373(m), 1281(w), 157(w), 1018(s), 972(w), 918(w).

Figure S8: <sup>1</sup>H NMR of L2a

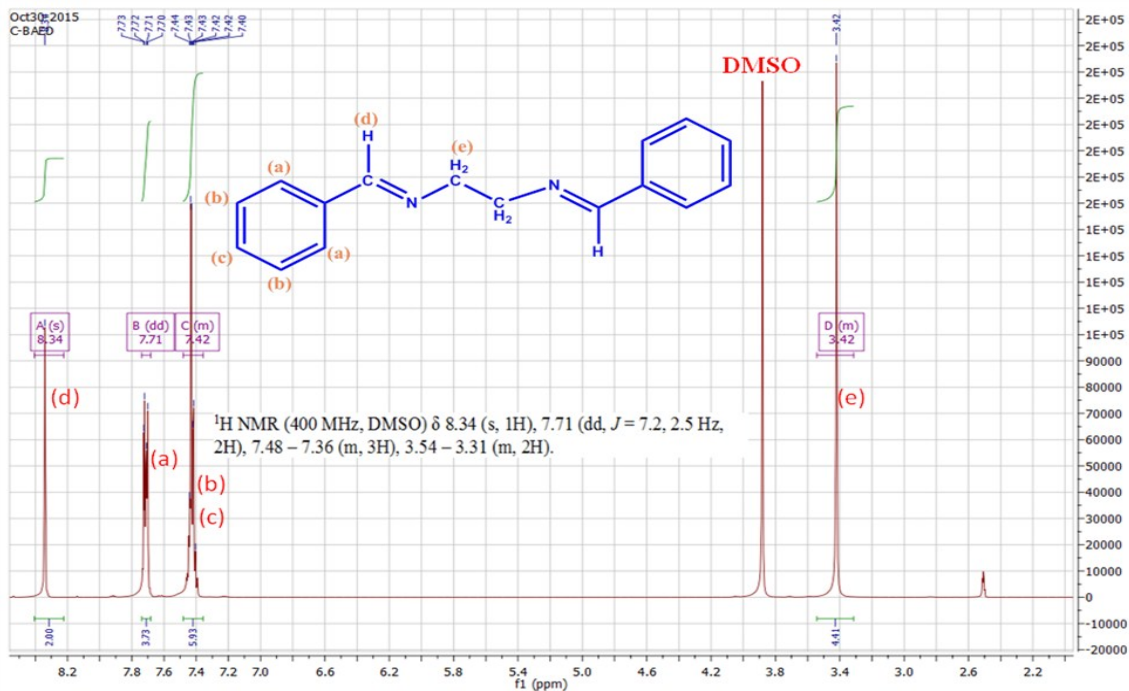

Figure S9: <sup>13</sup>C NMR of L2a

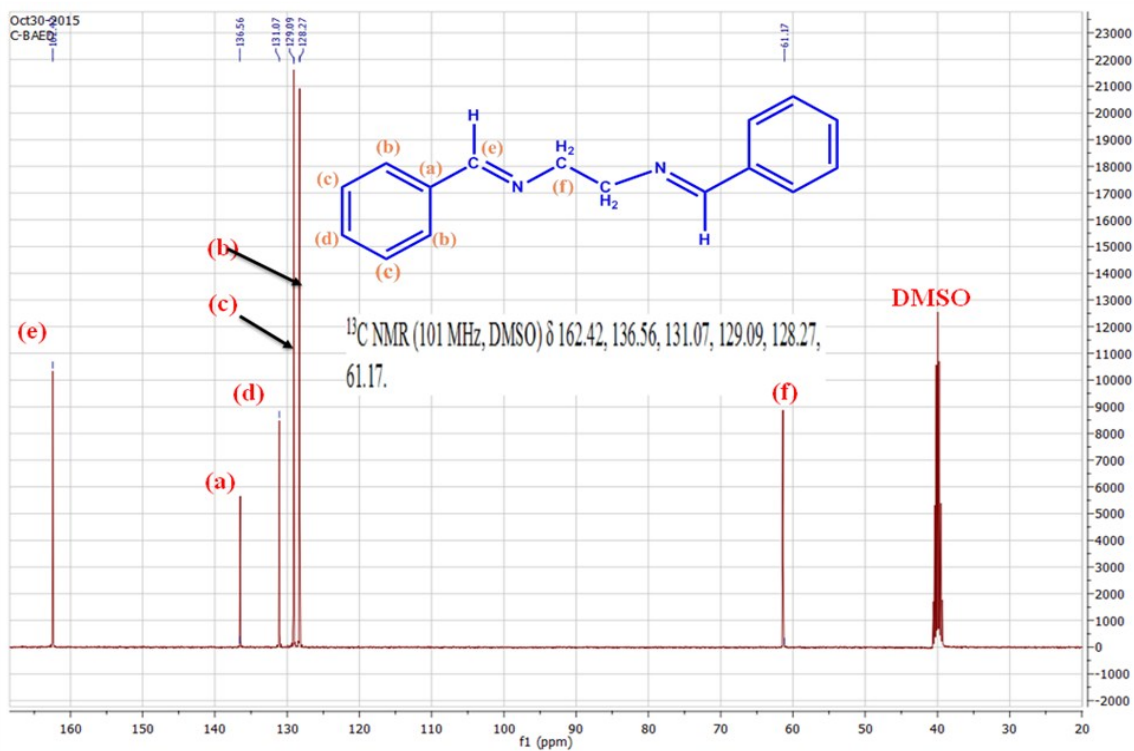

Figure S10: IR of L2b

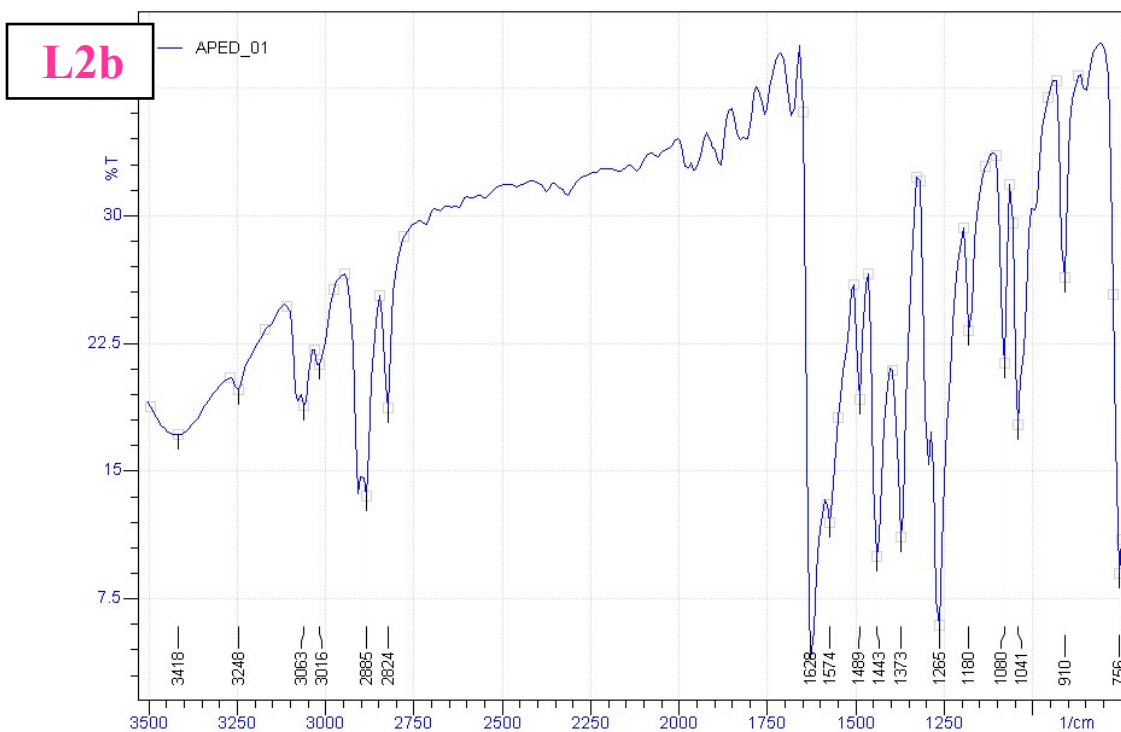

**IR (cm<sup>-1</sup> KBr pellet):** 3418(m), 3248(w), 3063(w), 3016(w), 2885(m), 2824(m), 1628(vs), 1574(w), 1489(w), 1443(m), 1373(m), 1265(vs), 1180(w), 1080(m), 1041(m), 910(m), 756(vs).

Figure S11: <sup>1</sup>H NMR of L2b

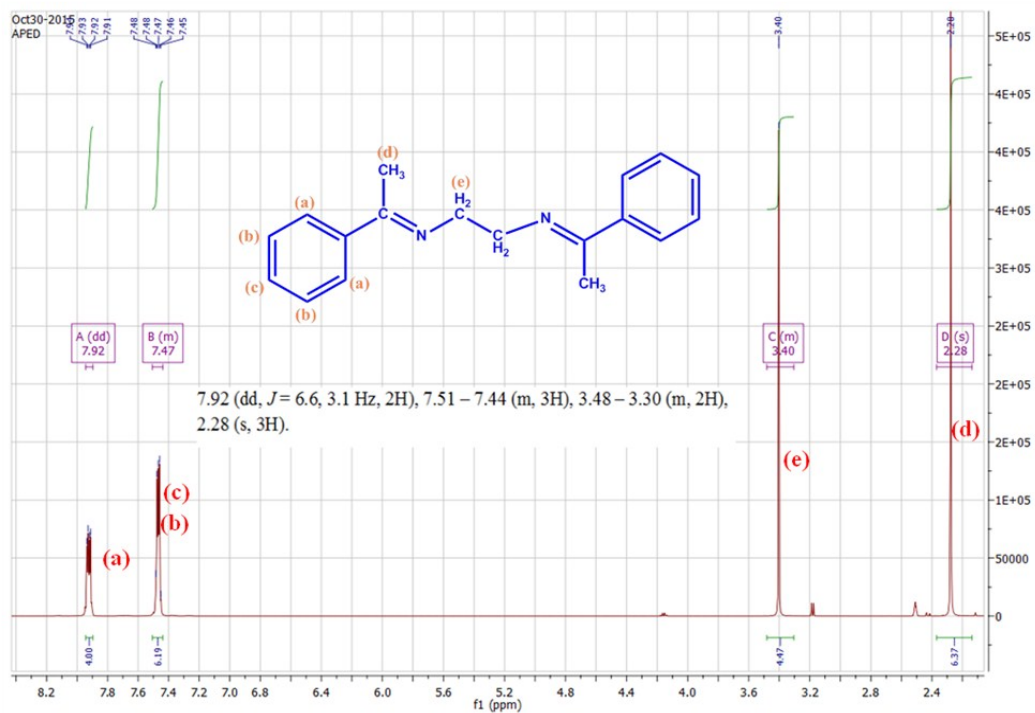

Figure S12:  $^{13}\text{C}$  NMR of L2b

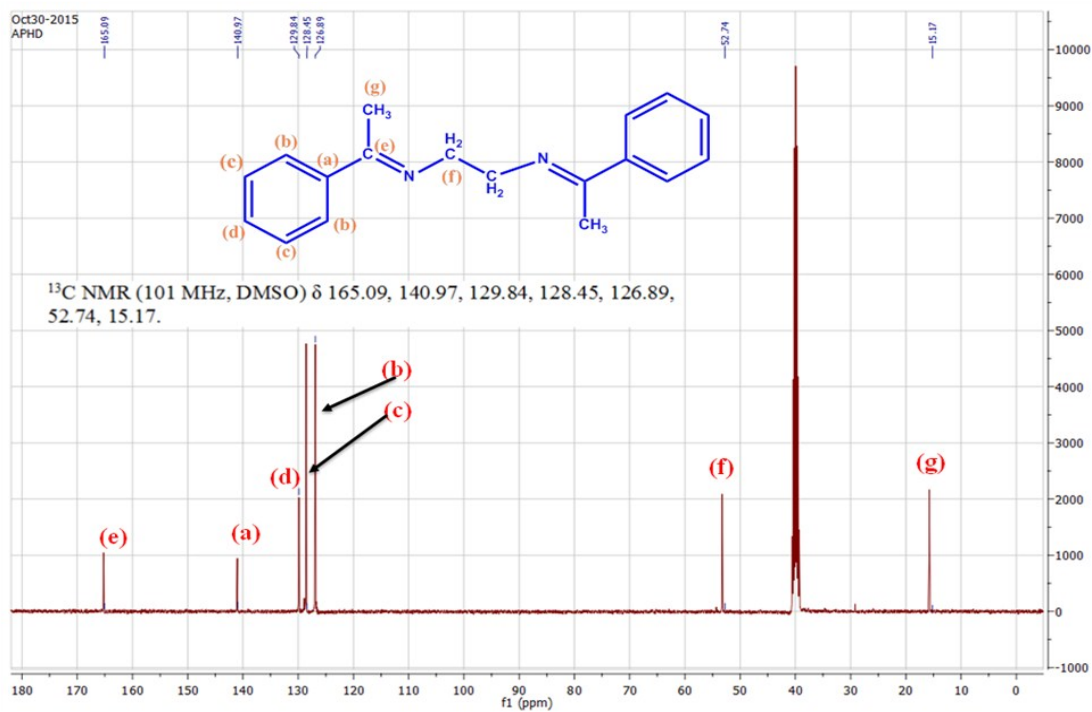

Figure S13: IR of L3a

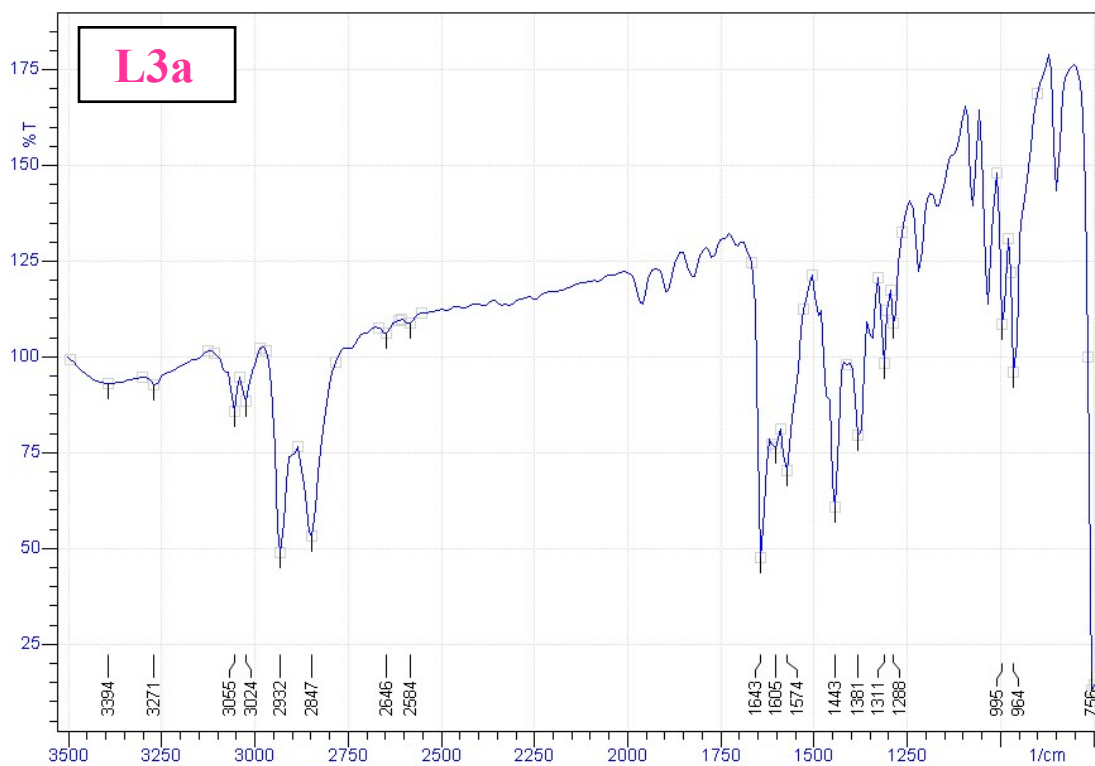

**IR ( $\text{cm}^{-1}$  KBr pellet):** 3394(w), 3271(w), 3055(w), 3024(w), 2932(m), 2847(m), 2646(w), 1643(vs), 1605(w), 1574(w), 1443(s), 1381(w), 1288(w), 965(w), 756(vs).

Figure S14:  $^1\text{H}$  NMR of L3a

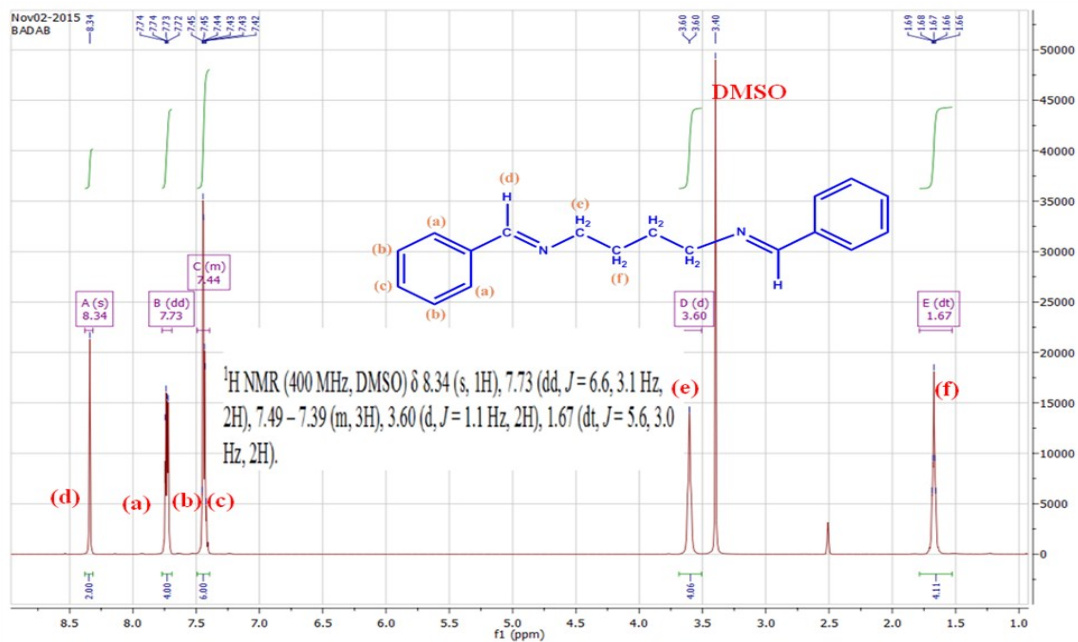

Figure S15:  $^{13}\text{C}$  NMR of L3a

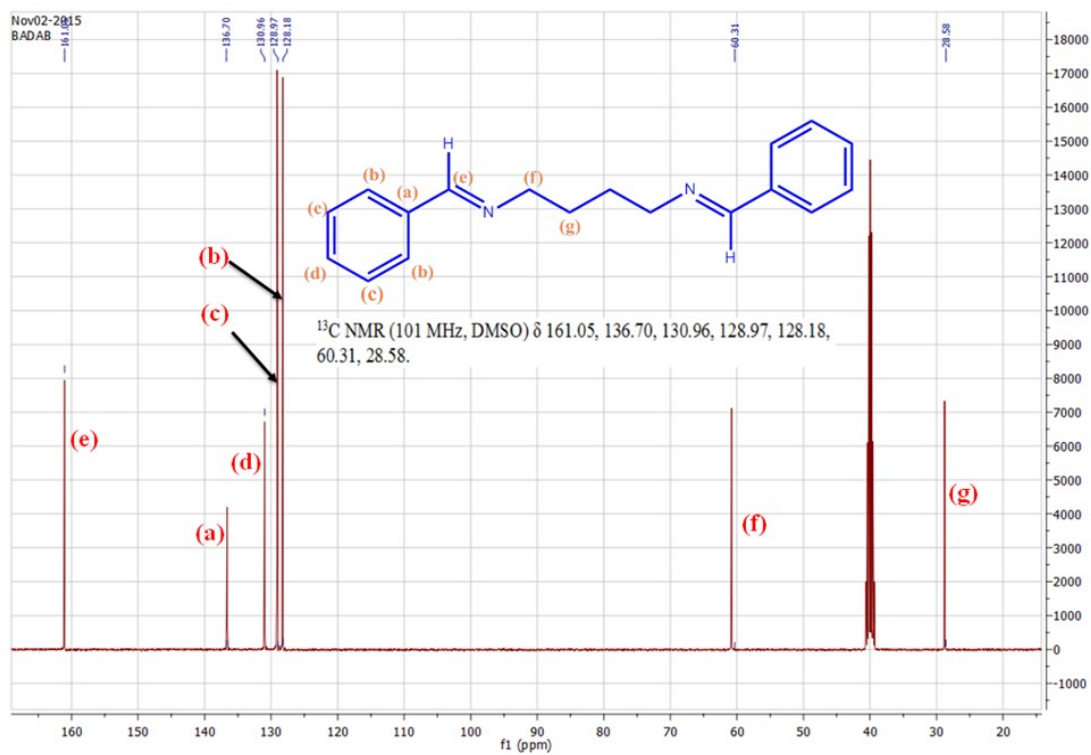



Figure S16: IR of L3b

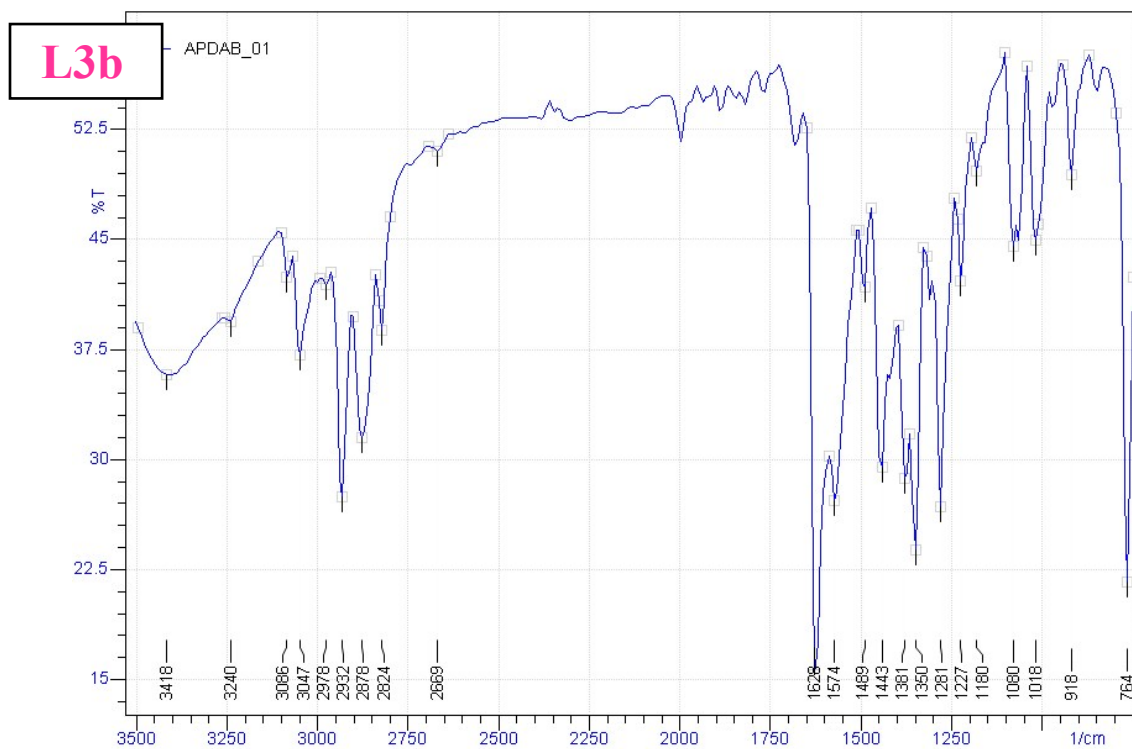

IR (cm<sup>-1</sup> KBr pellet): 3418(m), 3240(w), 3086(w), 3047(w), 2932(m), 2878(m), 1628(vs), 1574(w), 1489(w), 1443(w), 1350(m), 1281(m), 1180(w), 1080(w), 918(w), 764(vs).

Figure S17: <sup>1</sup>H NMR of L3b

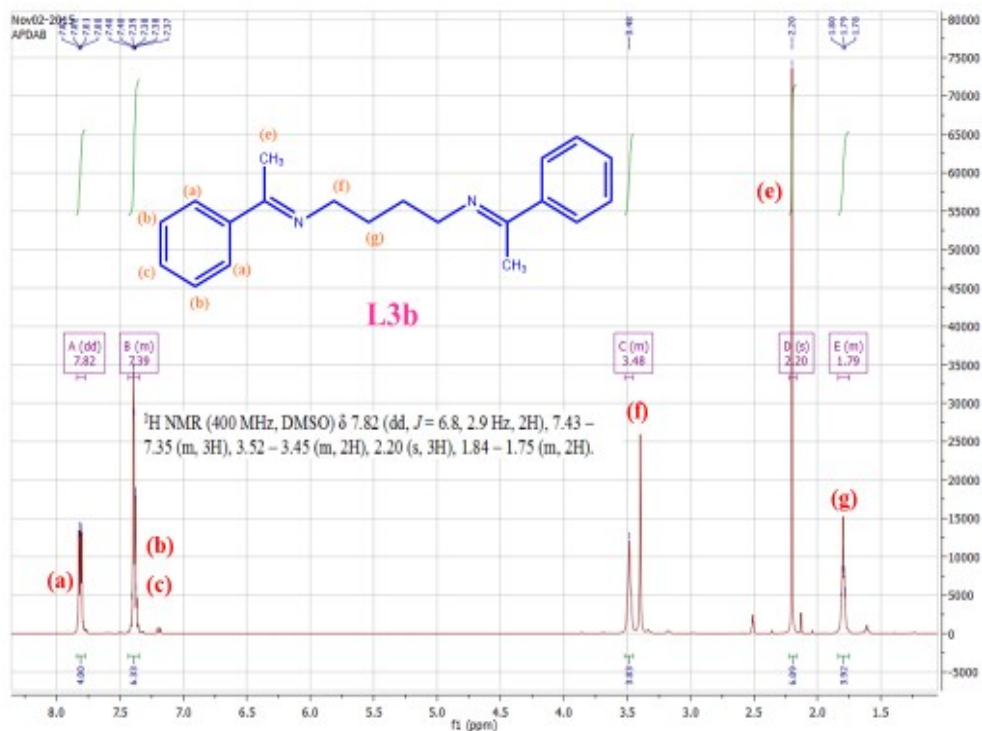

Figure S18:  $^{13}\text{C}$  NMR of L3b

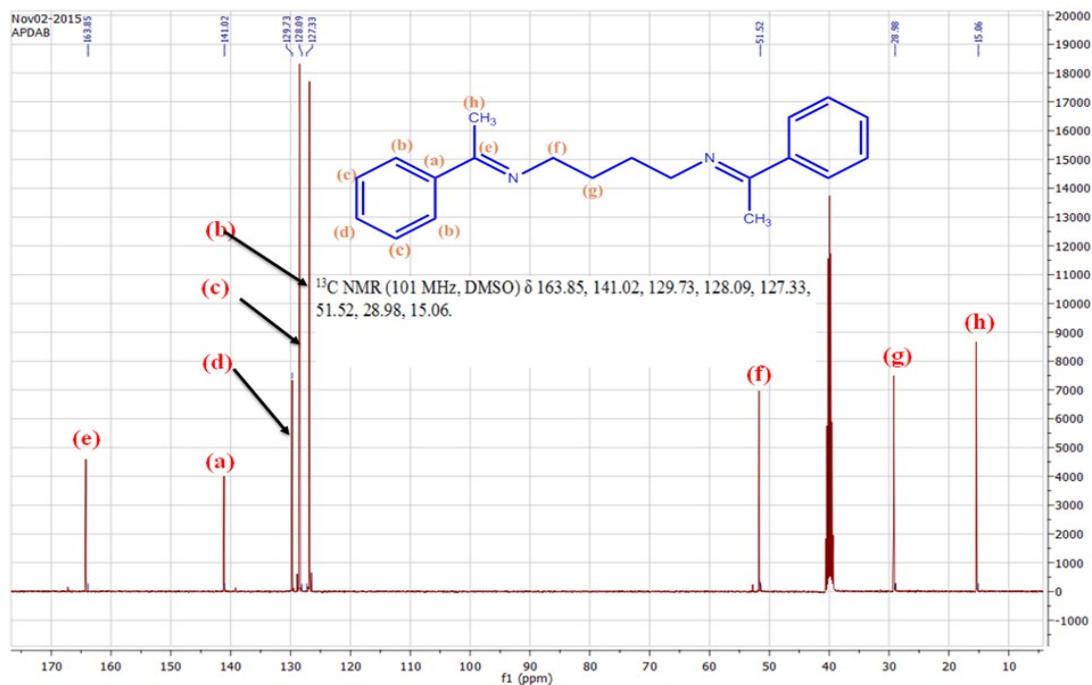

Figure S19: IR of L4a

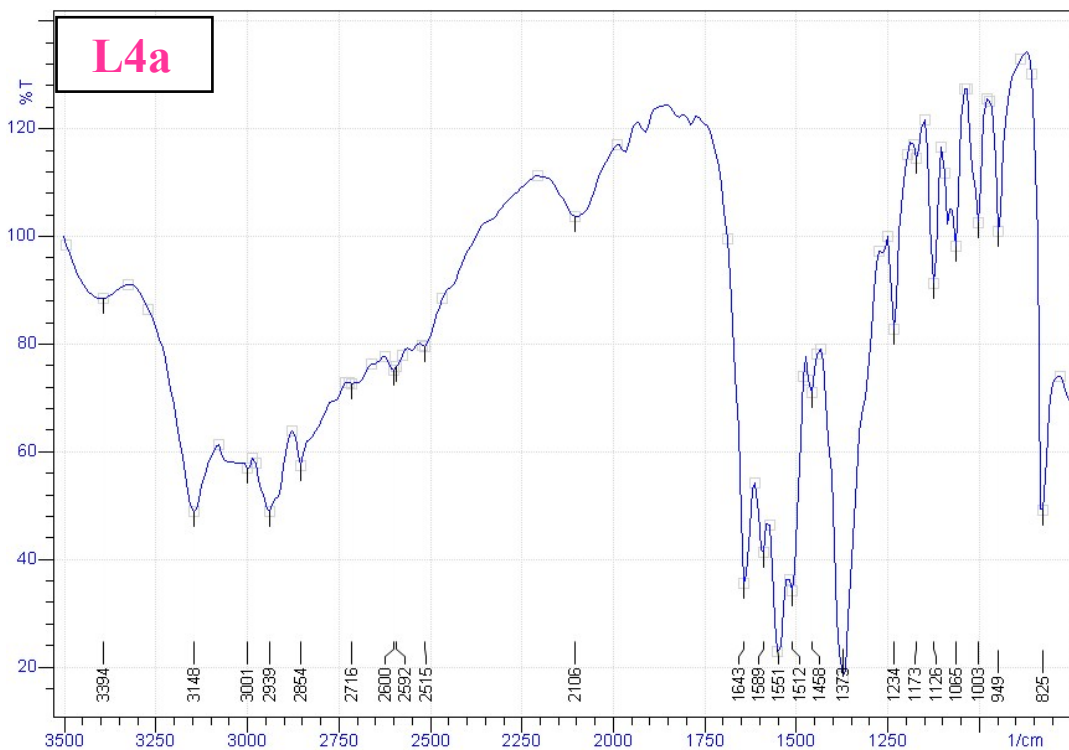

IR ( $\text{cm}^{-1}$  KBr pellet): 3394(w), 3148(m), 3001(w), 2939(w), 2854(w), 2716(w), 2106(w), 1643(s), 1589(w), 1551(vs), 1379(vs), 1234(w), 1173(w), 1065(w), 949(w), 825(s).

Figure S20: <sup>1</sup>H NMR of L4a

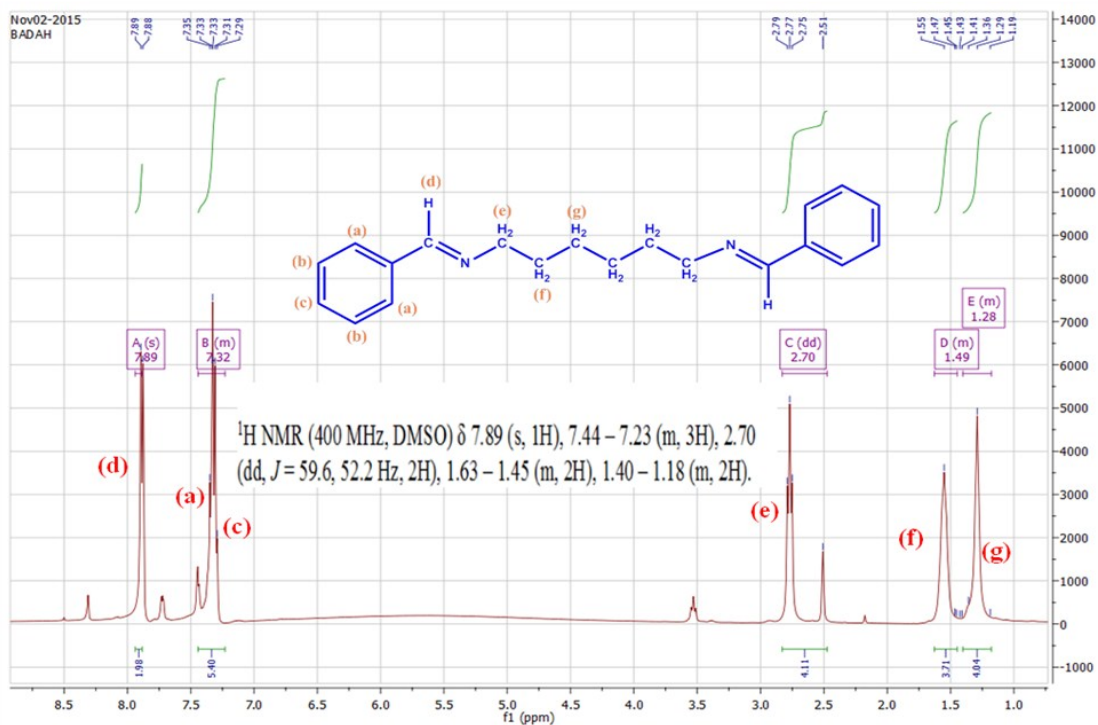

Figure S21: <sup>13</sup>C NMR of L4a

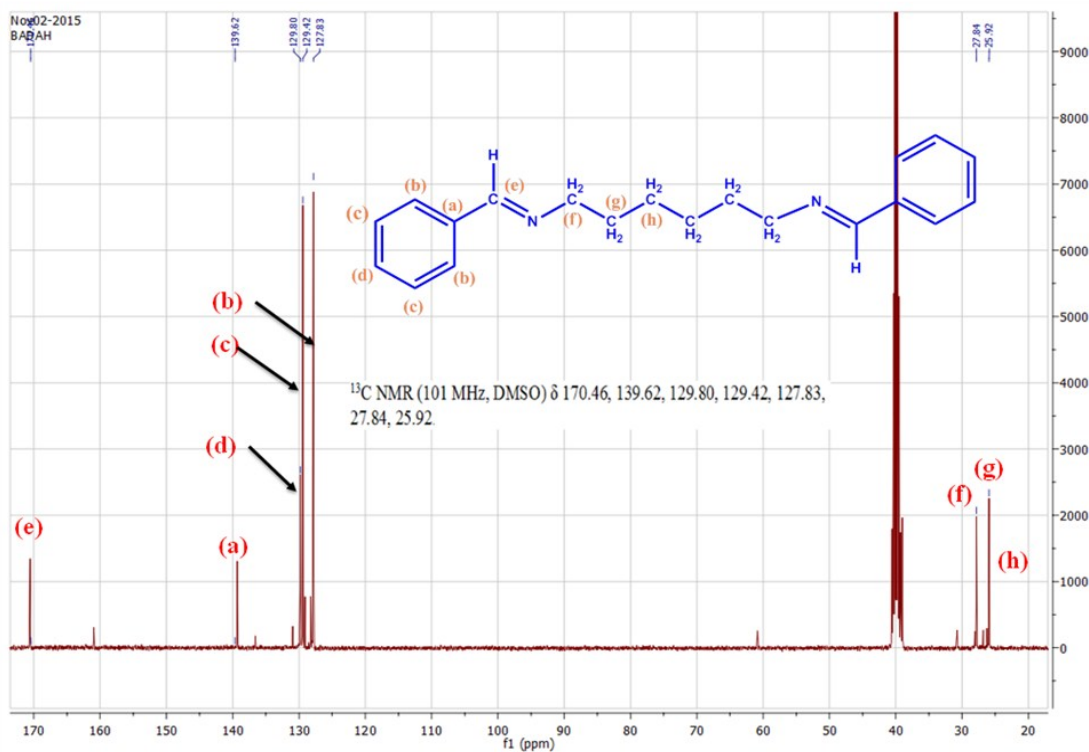

Figure S22: IR of L4b

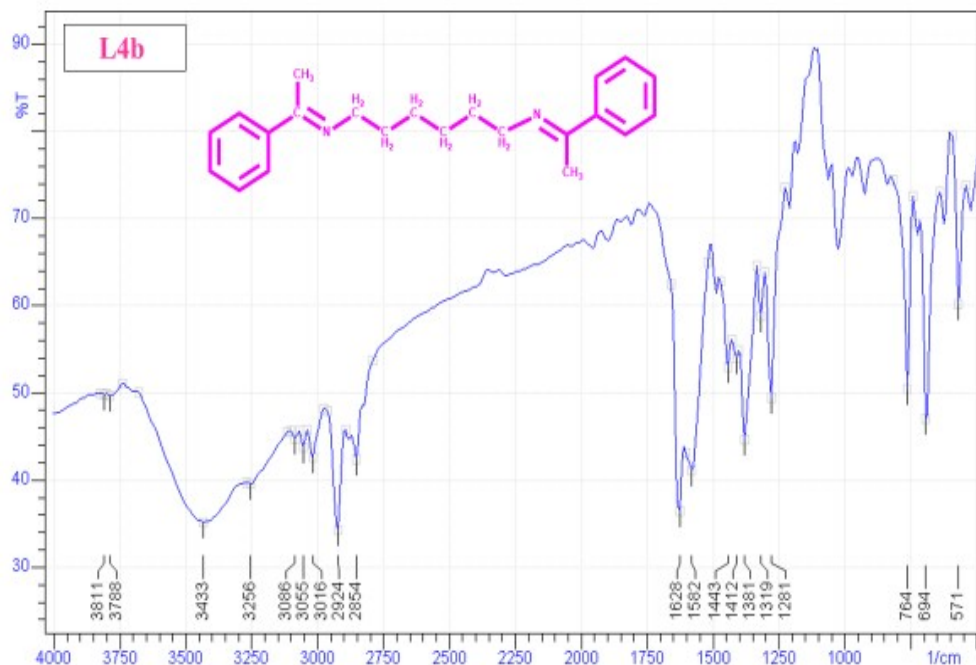

**IR (cm<sup>-1</sup> KBr pellet):** 3811(w), 3433(m), 3256(w), 3055(w), 2924(m), 2854(w), 1628(vs), 1582(w), 1443(w), 1412(m), 1381(m), 1281(w), 794(m), 694(s), 571(w).

Figure S23: <sup>1</sup>H NMR of L4b

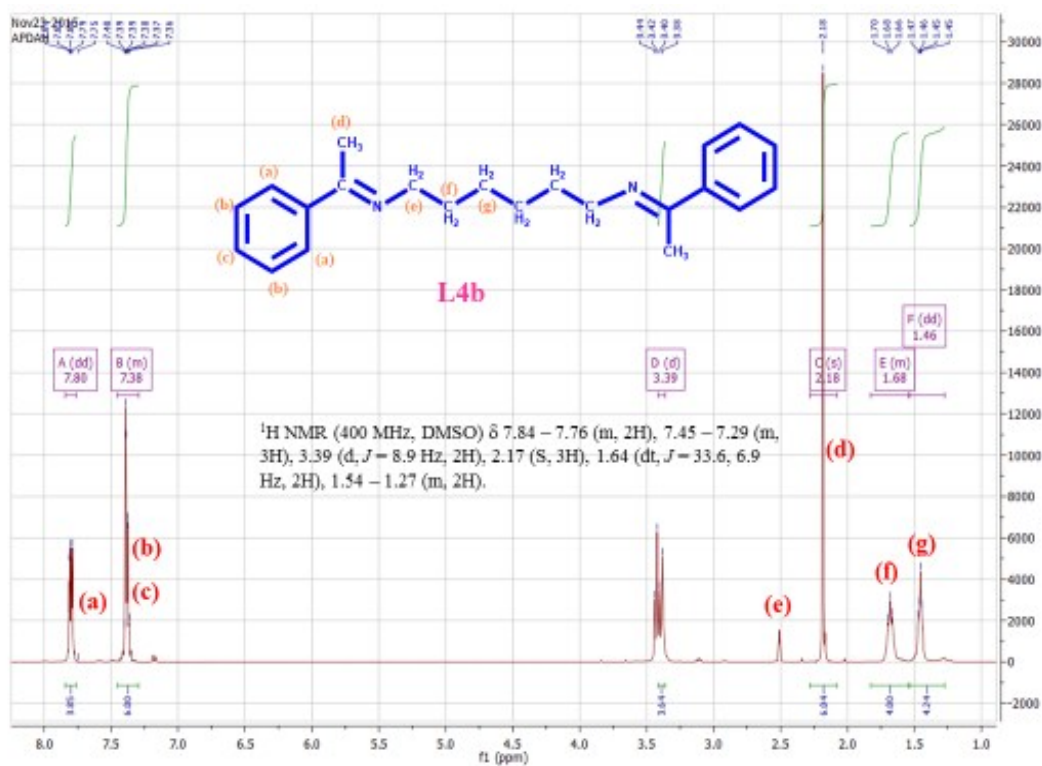

Figure S24:  $^{13}\text{C}$  NMR of L4b

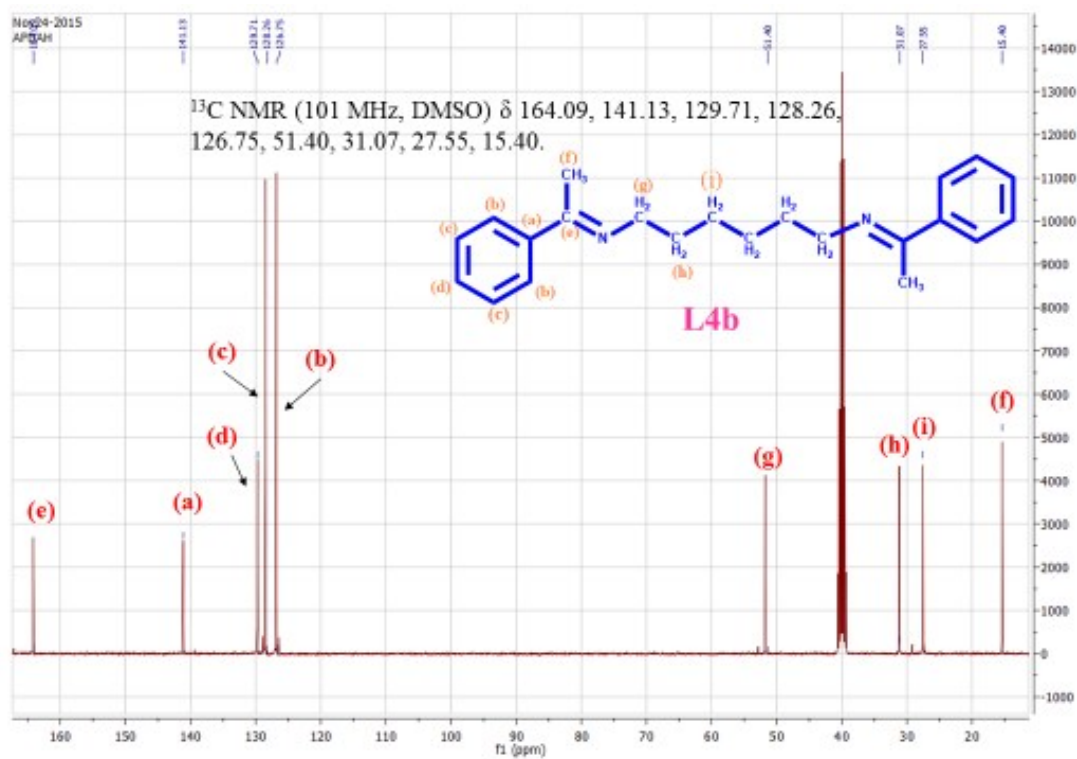

Figure S25: Experimental Powder XRD of L2a

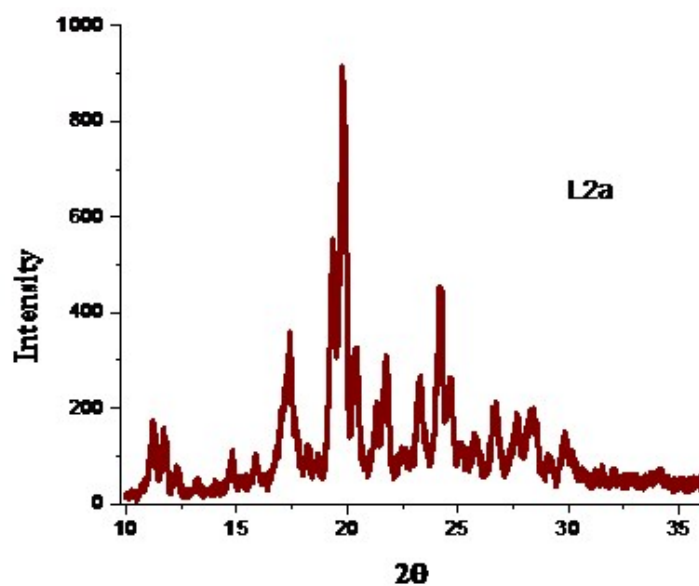

Figure S26: Experimental Powder XRD of L3a

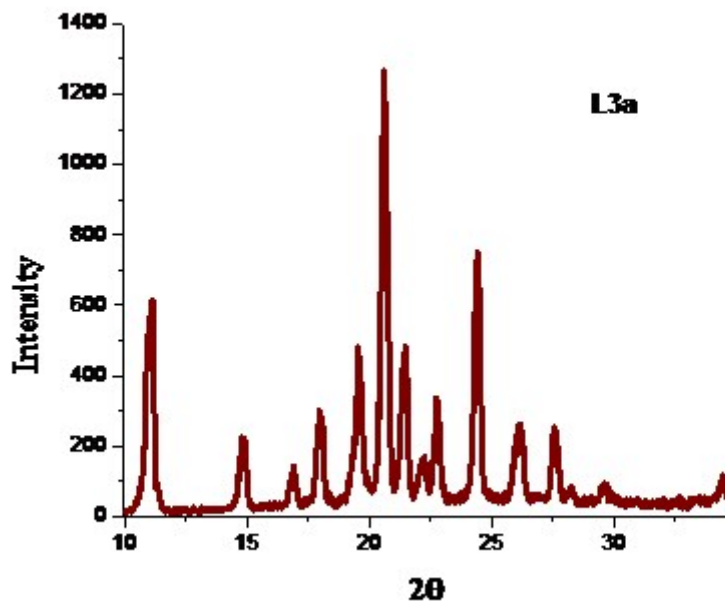

Figure S27: Experimental Powder XRD of L3b

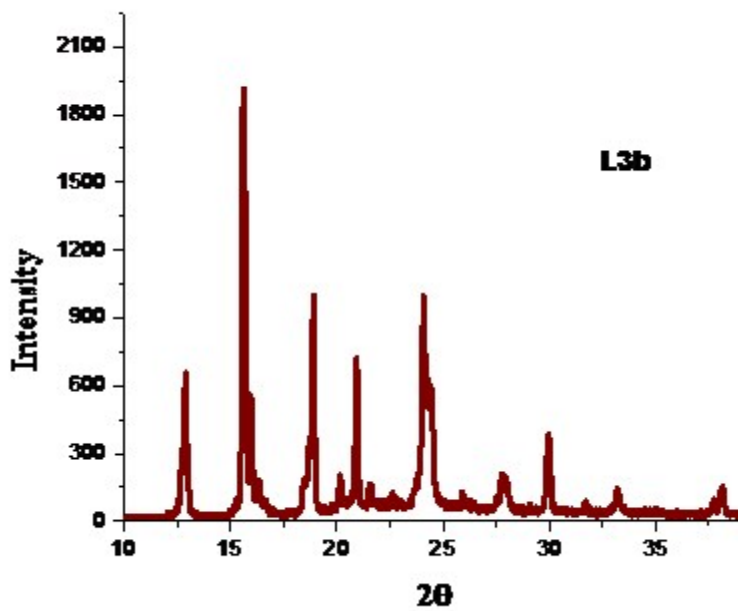

Figure S28: Experimental Powder XRD of L4a

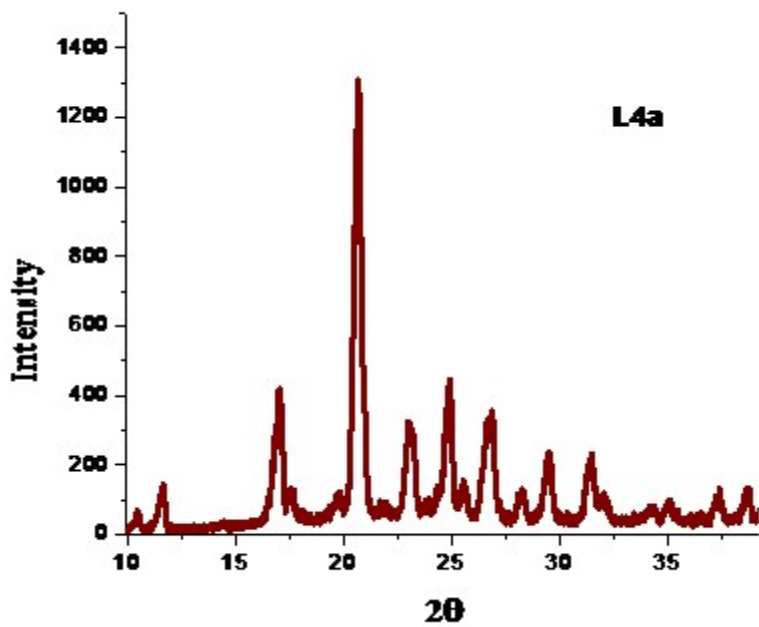

Figure S29: Experimental Powder XRD of L4b

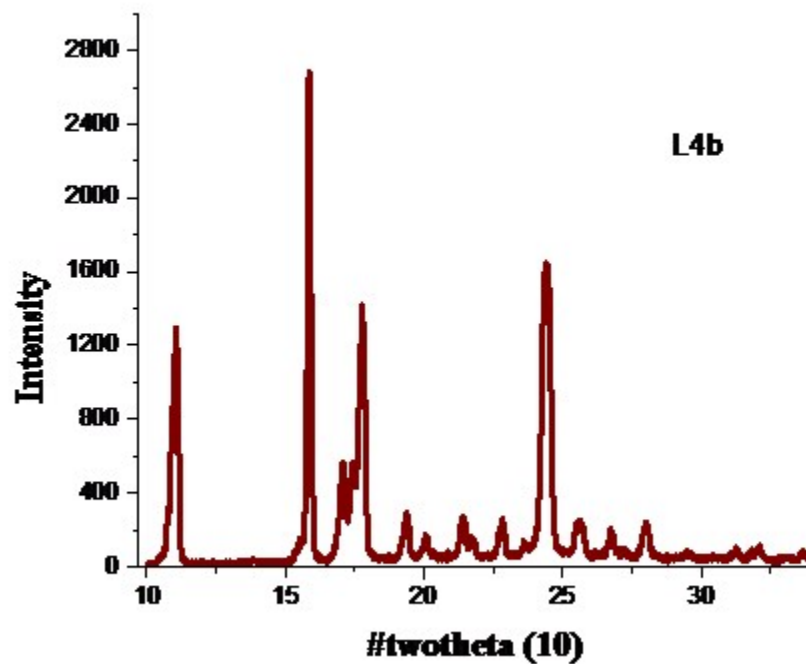

**Figure S30:** UV-Visible Spectrum of **L1a** in MeOH: Concentration :  $10^{-4}$ M

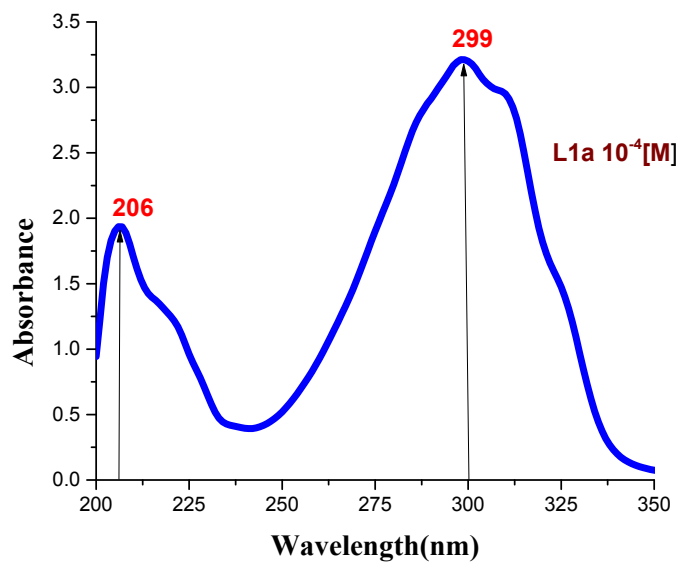

**Figure S31:** UV-Visible Spectrum of **L1b** in MeOH: Concentration:  $10^{-4}$ M

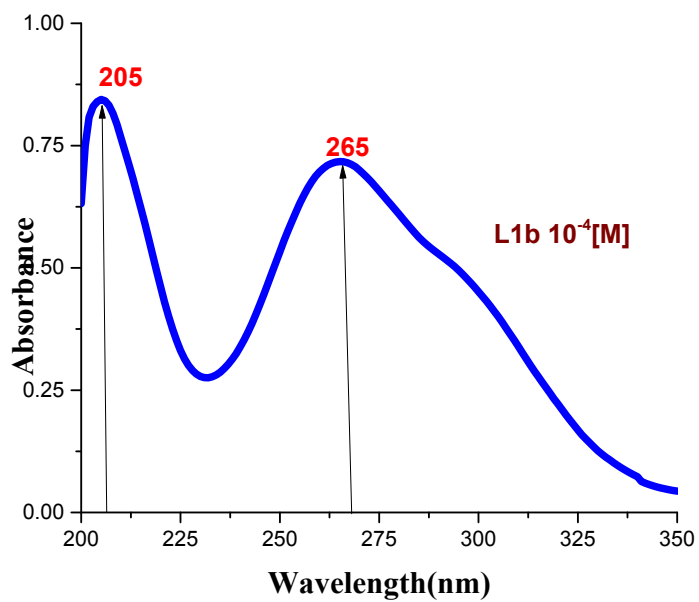



**Figure S32:** UV-Visible Spectrum of **L2a** in MeOH Concentration:  $10^{-4}$ M

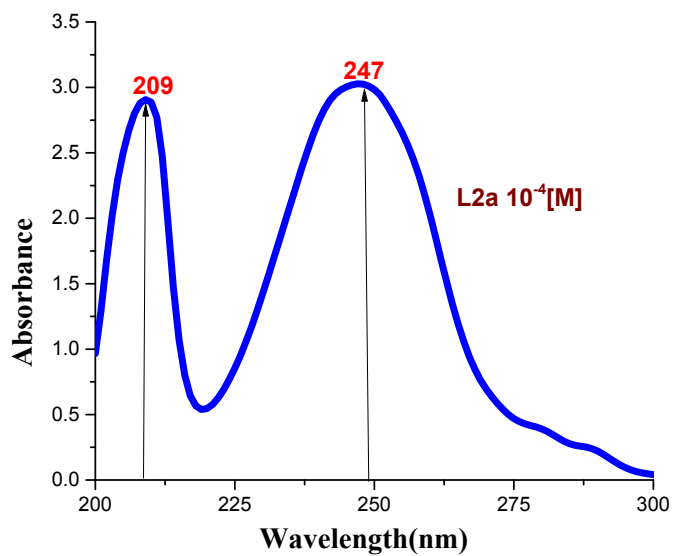

**Figure S33:** UV-Visible Spectrum of **L2b** in MeOH Concentration:  $10^{-4}$ M

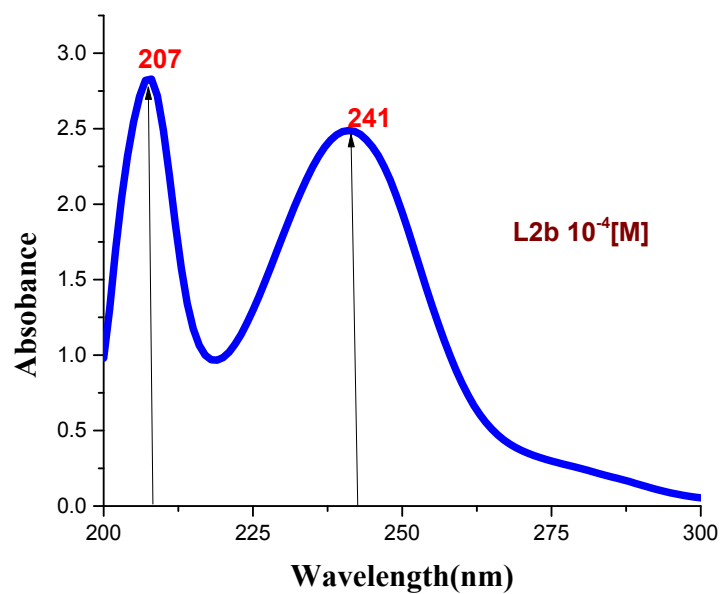

**Figure S34:** UV-Visible Spectrum of **L3a** in MeOH Concentration:  $10^{-4}$ M

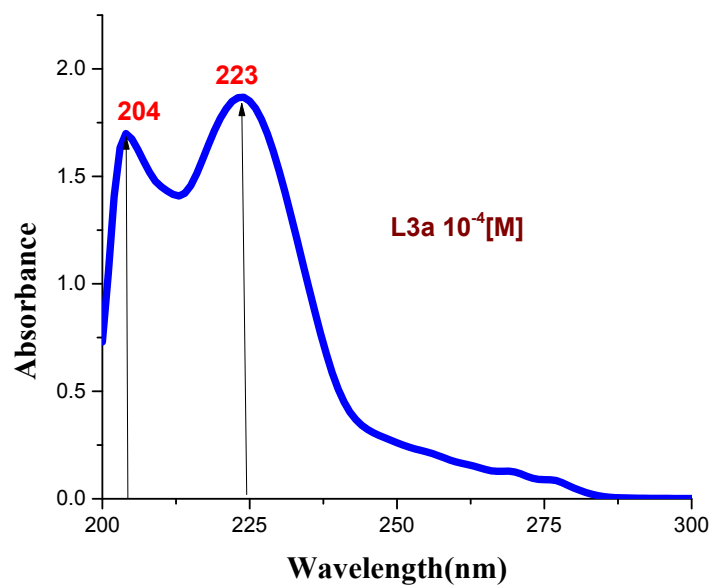

**Figure S35:** UV-Visible Spectrum of **L3b** in MeOH Concentration:  $10^{-4}$ M

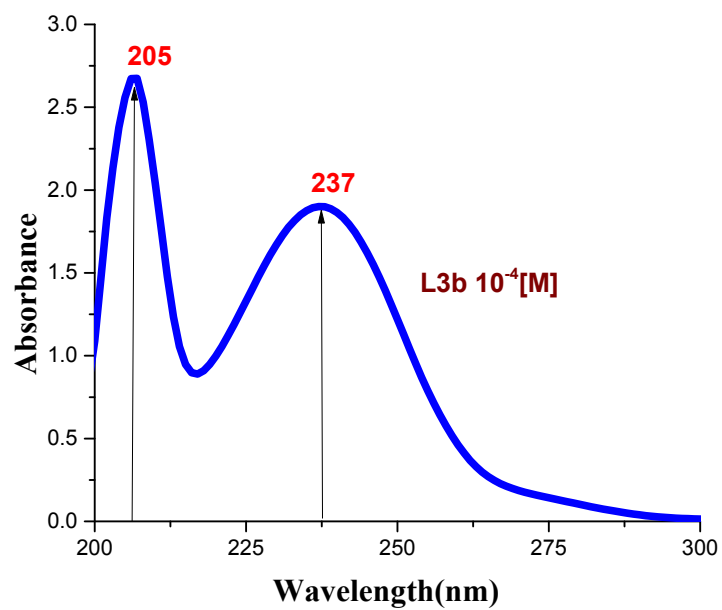

**Figure S36:** UV-Visible Spectrum of **L4a** in MeOH Concentration:  $10^{-4}$ M

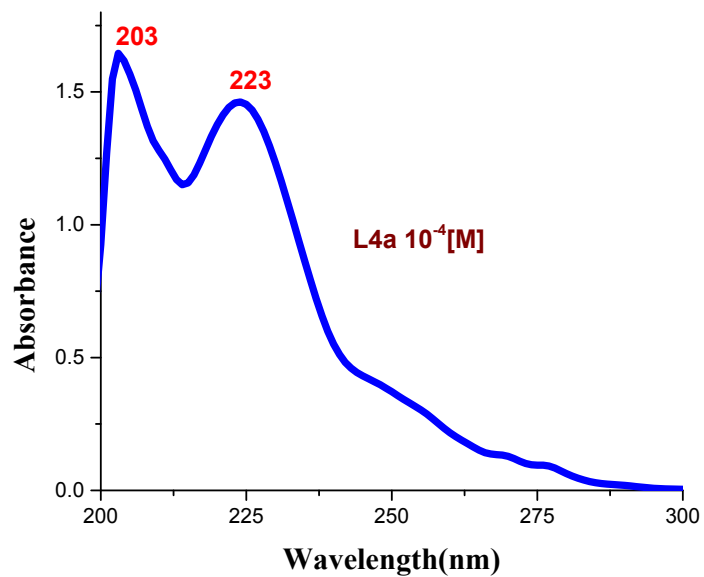

**Figure S37:** UV-Visible Spectrum of **L4b** in MeOH Concentration:  $10^{-4}$ M

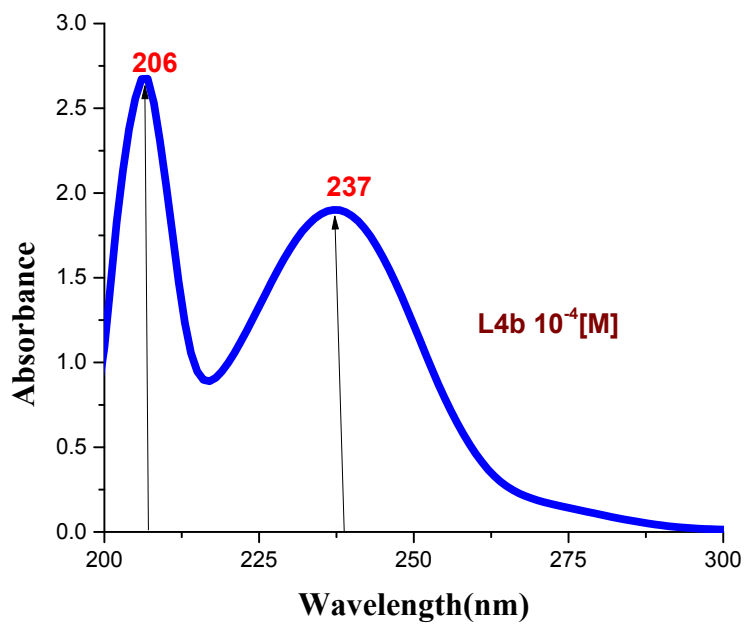

**Figure S38:** PL spectra of (a) **L3a** at an excitation wavelength of 420 nm; (b) **L3b** at excitation wavelength of 320 nm and 420 nm

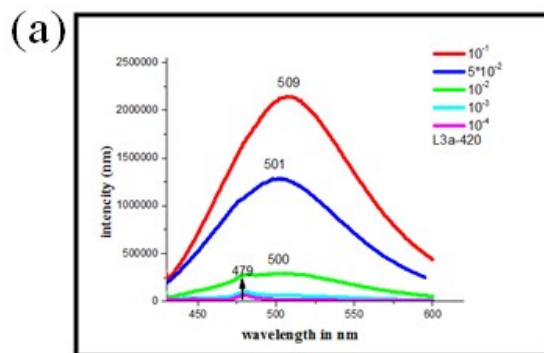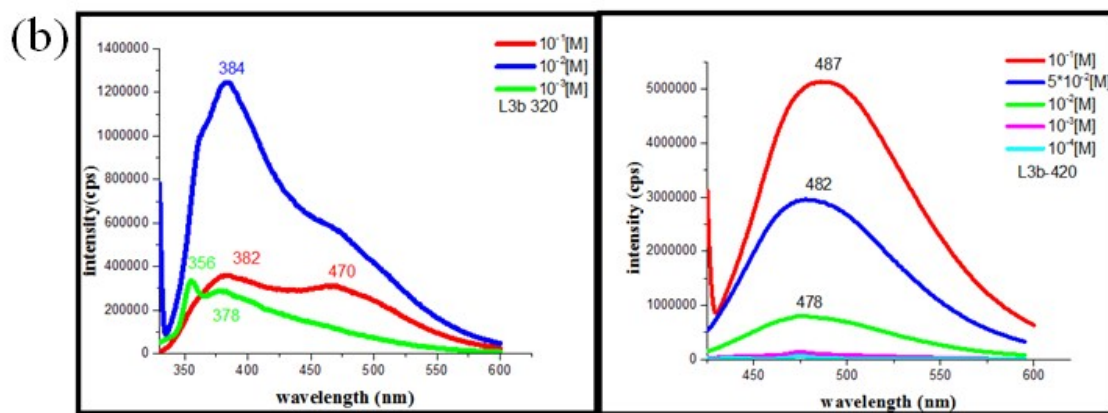

**Figure 39:** PL Spectra of (a) **L4a** in different concentrations at an excitation wavelength of 280nm; (b) **L4a** in different concentrations at an excitation wavelength of 450nm; (c) **L4b** in different concentrations at an excitation wavelength of 320nm; (d) **L4b** in different concentrations at an excitation wavelength of 420nm

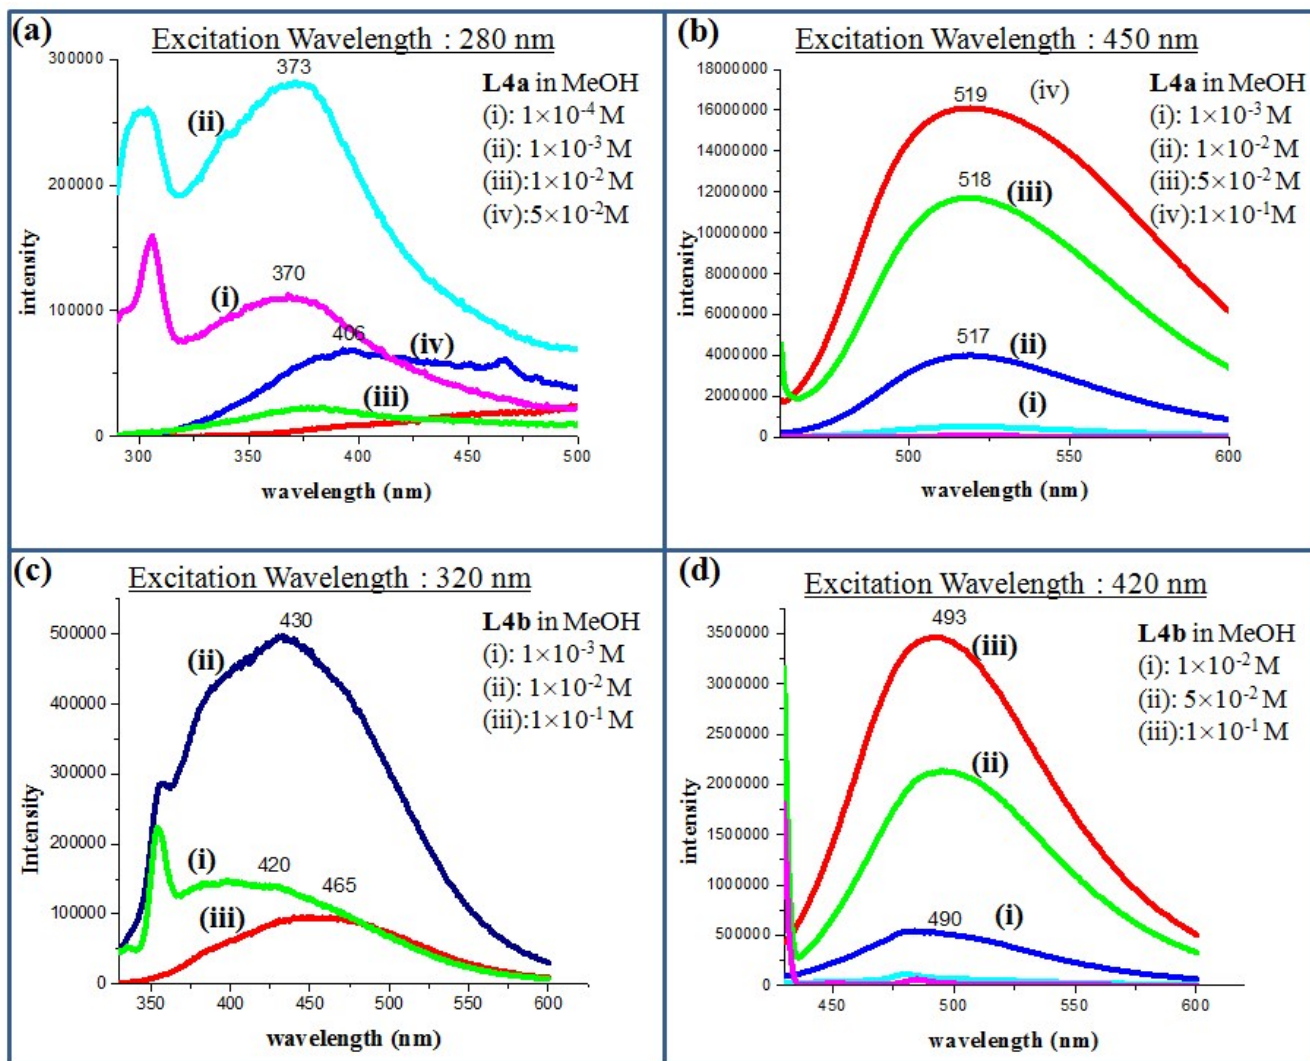

Figure S40: PL spectra of L2a and L2b in Solid State

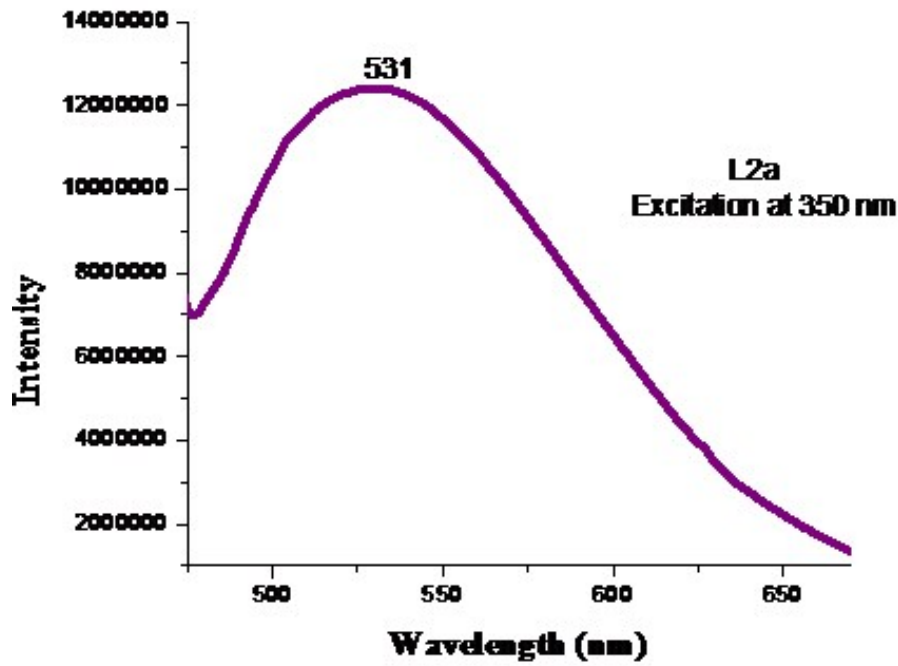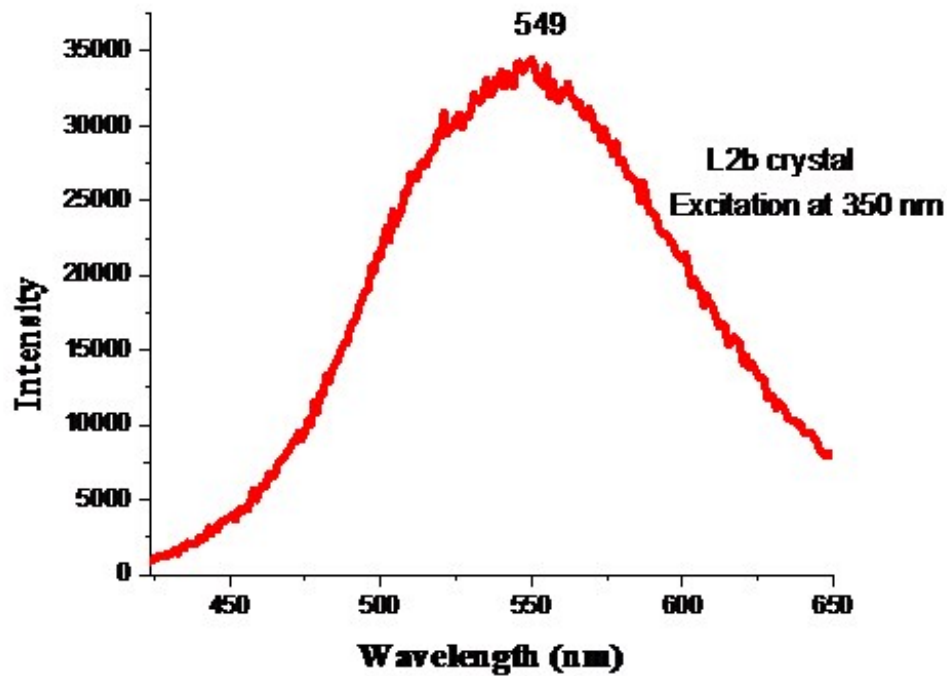

Figure S41: PL spectra of L3a in Solid State

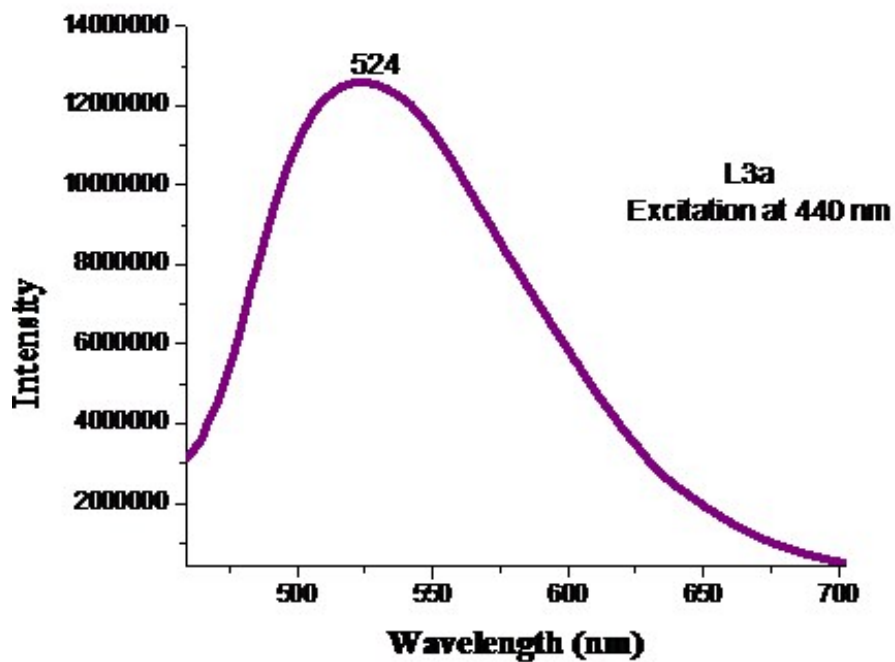

Figure S42: PL spectra of L3b in Solid State

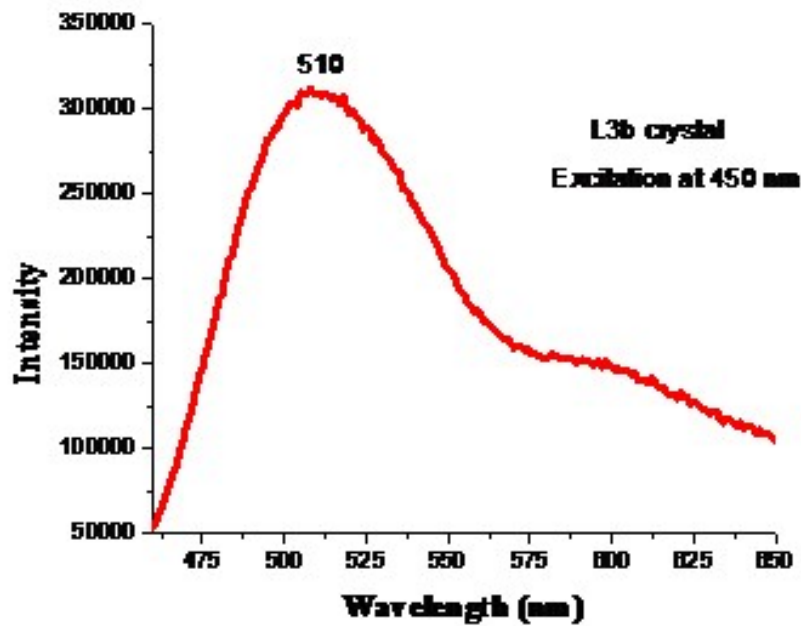

**Figure S43:** PL spectra of **L4a** in Solid State

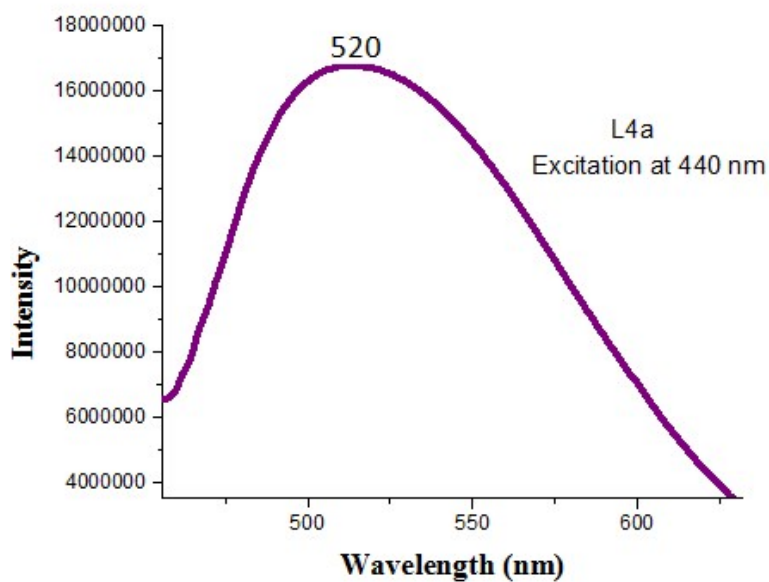

**Figure S44:** PL spectra of **L4b** in Solid State

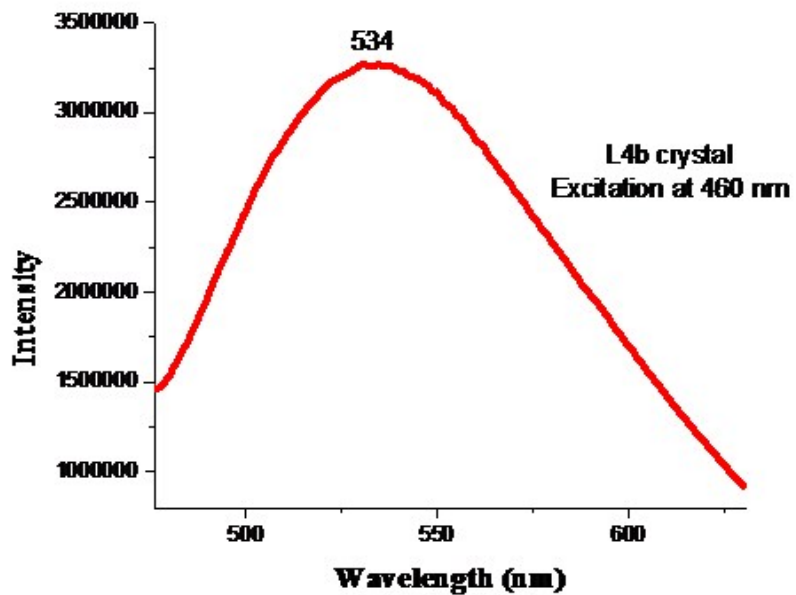



**Table S1:**  $\lambda_{\text{max}}$  in the PL Spectra in solutions of different concentration and at different excitations

| $\lambda_{\text{ex}}$ | 300 nm       |                               | 350 nm       |                               | 400 nm       |                               | 450 nm       |                               |
|-----------------------|--------------|-------------------------------|--------------|-------------------------------|--------------|-------------------------------|--------------|-------------------------------|
|                       | Conc.<br>(M) | $\lambda_{\text{em}}$<br>(nm) | Conc.<br>(M) | $\lambda_{\text{em}}$<br>(nm) | Conc.<br>(M) | $\lambda_{\text{em}}$<br>(nm) | Conc.<br>(M) | $\lambda_{\text{em}}$<br>(nm) |
| <b>L2a</b>            | 0.1          | 439                           | 0.1          | 435                           | 0.1          | 474                           | 0.1          | 518                           |
|                       | 0.01         | 358,428                       | 0.01         | 432                           | 0.01         | 466                           | 0.01         | 517                           |
|                       | 0.001        | 359,426                       | 0.001        | 431                           | 0.001        | 453                           | 0.001        | 517                           |
|                       | 0.0001       | 330,364                       | 0.0001       | 391,429                       | 0.0001       | 452                           | 0.0001       | 518                           |
| <b>L2b</b>            | 0.1          | 464                           | 0.1          | 440                           | 0.1          | 466                           | 0.1          | 500                           |
|                       | 0.01         | 365,431                       | 0.01         | 435                           | 0.01         | 459                           | 0.01         | 490                           |
|                       | 0.001        | 359,424                       | 0.001        | 433                           | 0.001        | 454                           | 0.001        | 489                           |
|                       | 0.0001       | 330,364                       | 0.0001       | 391,429                       | 0.0001       | 453                           | 0.0001       | 489                           |
|                       |              |                               |              |                               |              |                               |              |                               |
| $\lambda_{\text{ex}}$ | 320 nm       |                               | 380 nm       |                               | 420 nm       |                               | 430 nm       |                               |
| <b>L3a</b>            | 0.1          | 463                           | 0.1          | 463                           | 0.1          | 509                           | 0.1          | 511                           |
|                       | 0.05         | 459                           | 0.05         | 461                           | 0.05         | 501                           | 0.05         | 504                           |
|                       | 0.01         | 391,449                       | 0.01         | 428,458                       | 0.01         | 500                           | 0.01         | 497                           |
|                       | 0.001        | 353,386                       | 0.001        | 428,460                       | 0.001        | 479                           | 0.0001       | 493                           |
|                       |              |                               |              |                               |              |                               |              |                               |
| $\lambda_{\text{ex}}$ | 320 nm       |                               | 350 nm       |                               | 400 nm       |                               | 450 nm       |                               |
| <b>L3b</b>            | 0.1          | 382,470                       | 0.1          | 469                           | 0.1          | 477                           | 0.1          | 508                           |
|                       | 0.01         | 384                           | 0.05         | 466                           | 0.05         | 475                           | 0.05         | 504                           |
|                       | 0.001        | 356,378                       | 0.01         | 392,463                       | 0.01         | 473                           | 0.01         | 503                           |
|                       |              |                               | 0.001        | 391,454                       | 0.0001       | 453                           |              |                               |
|                       |              | 0.0001                        | 390,430      |                               |              |                               |              |                               |

| $\lambda_{ex}$ | 280 nm       |                        | 320 nm       |                        | 380 nm       |                        | 450 nm       |                        |
|----------------|--------------|------------------------|--------------|------------------------|--------------|------------------------|--------------|------------------------|
| <b>L4a</b>     | 0.1          | 514                    | 0.1          | 394                    | 0.1          | 464                    | 0.1          | 519                    |
|                | 0.05         | 406                    | 0.05         | 386                    | 0.05         | 462                    | 0.05         | 518                    |
|                | 0.01         | 383                    | 0.01         | 383                    | 0.01         | 460                    | 0.01         | 517                    |
|                | 0.001        | 304,373                | 0.001        | 380                    | 0.001        | 460                    | 0.001        | 517                    |
|                | 0.0001       | 306,370                |              |                        |              |                        | 0.0001       | 517                    |
| $\lambda_{ex}$ | 320 nm       |                        | 380 nm       |                        | 400 nm       |                        | 420 nm       |                        |
|                | Conc.<br>(M) | $\lambda_{em}$<br>(nm) | Conc.<br>(M) | $\lambda_{em}$<br>(nm) | Conc.<br>(M) | $\lambda_{em}$<br>(nm) | Conc.<br>(M) | $\lambda_{em}$<br>(nm) |
| <b>L4b</b>     | 0.1          | 465                    | 0.1          | 469                    | 0.1          | 481                    | 0.1          | 493                    |
|                | 0.01         | 356,430                | 0.05         | 468                    | 0.05         | 479                    | 0.05         | 493                    |
|                | 0.001        | 353,420                | 0.01         | 464                    | 0.01         | 474                    | 0.01         | 490                    |
|                |              |                        | 0.001        | 429,461                | 0.001        | 453                    | 0.001        | 480                    |
|                |              |                        | 0.0001       | 428                    | 0.0001       | 453                    | 0.0001       | 484                    |

Figure S45: Absorption and emission spectra (excitation 300nm) of the compounds

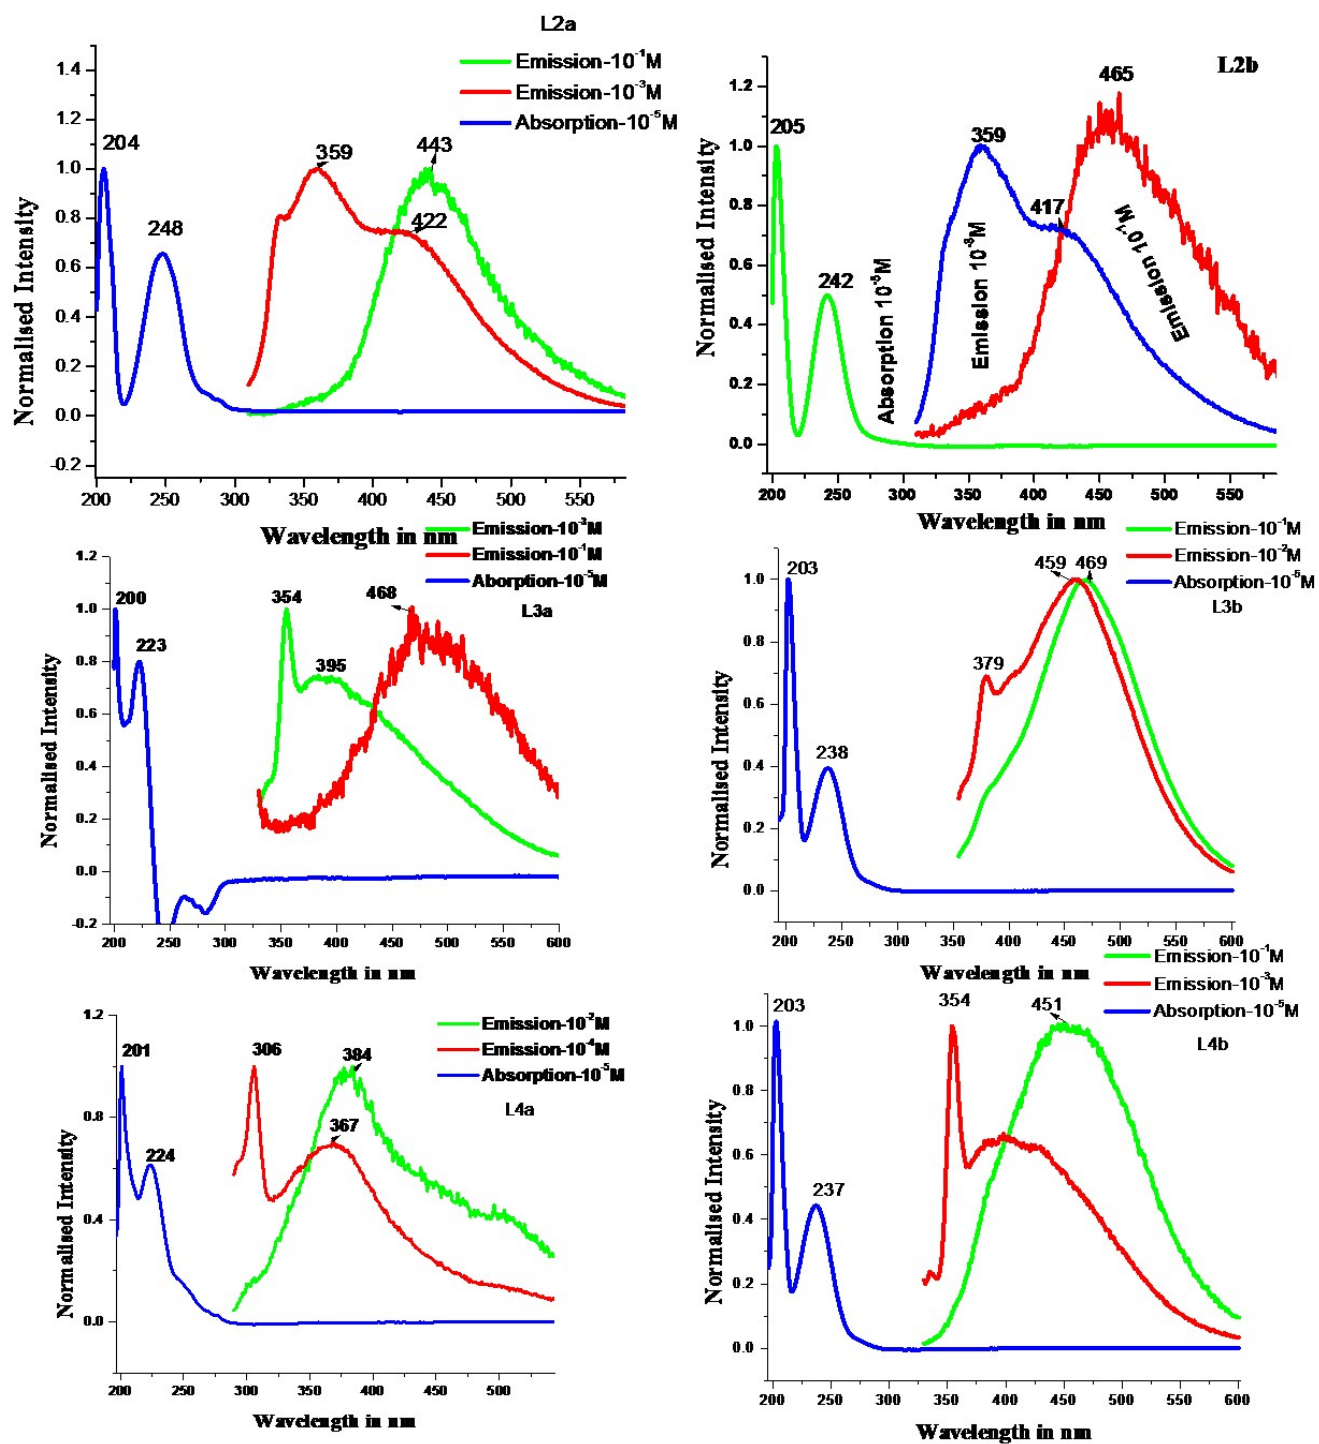

**Table S2:** Molar Extinction Coefficient of UV-Vis spectra of **L2b**, **L3a**, **L3b**, **L4a** and **L4b** in wavelengths near 300nm

| Compounds  |                    | Molar Extinction coefficient ( $\epsilon$ ) ( $M^{-1}cm^{-1}$ ) | Wavelength in nm         |
|------------|--------------------|-----------------------------------------------------------------|--------------------------|
| <b>L2b</b> | 10 <sup>-4</sup> M | 521<br>607<br>2796                                              | 349<br>330<br>284        |
|            | 10 <sup>-5</sup> M | 930<br>23170<br>45310                                           | 330<br>241<br>202        |
| <b>L3a</b> | 10 <sup>-3</sup> M | 126.7                                                           | 299                      |
|            | 10 <sup>-4</sup> M | 259<br>375<br>1760<br>1338                                      | 345<br>300<br>269<br>277 |
|            | 10 <sup>-5</sup> M | -136570<br>10250<br>12600                                       | 345<br>223<br>201        |
| <b>L3b</b> | 10 <sup>-4</sup> M | 693<br>2255                                                     | 349<br>275               |
|            | 10 <sup>-5</sup> M | 1620<br>20370<br>48380                                          | 349<br>238<br>202        |
| <b>L4a</b> | 10 <sup>-4</sup> M | 493<br>1361<br>1842                                             | 347<br>277<br>269        |
|            | 10 <sup>-5</sup> M | 540<br>16720<br>26650                                           | 349<br>223<br>201        |
| <b>L4b</b> | 10 <sup>-4</sup> M | 774<br>2365                                                     | 348<br>278               |
|            | 10 <sup>-5</sup> M | 1710<br>29620<br>64060                                          | 348<br>237<br>202        |

**Figure S46:** TCSPC decay profiles of **L2a** in different concentration in MeOH with excitation at 375 nm

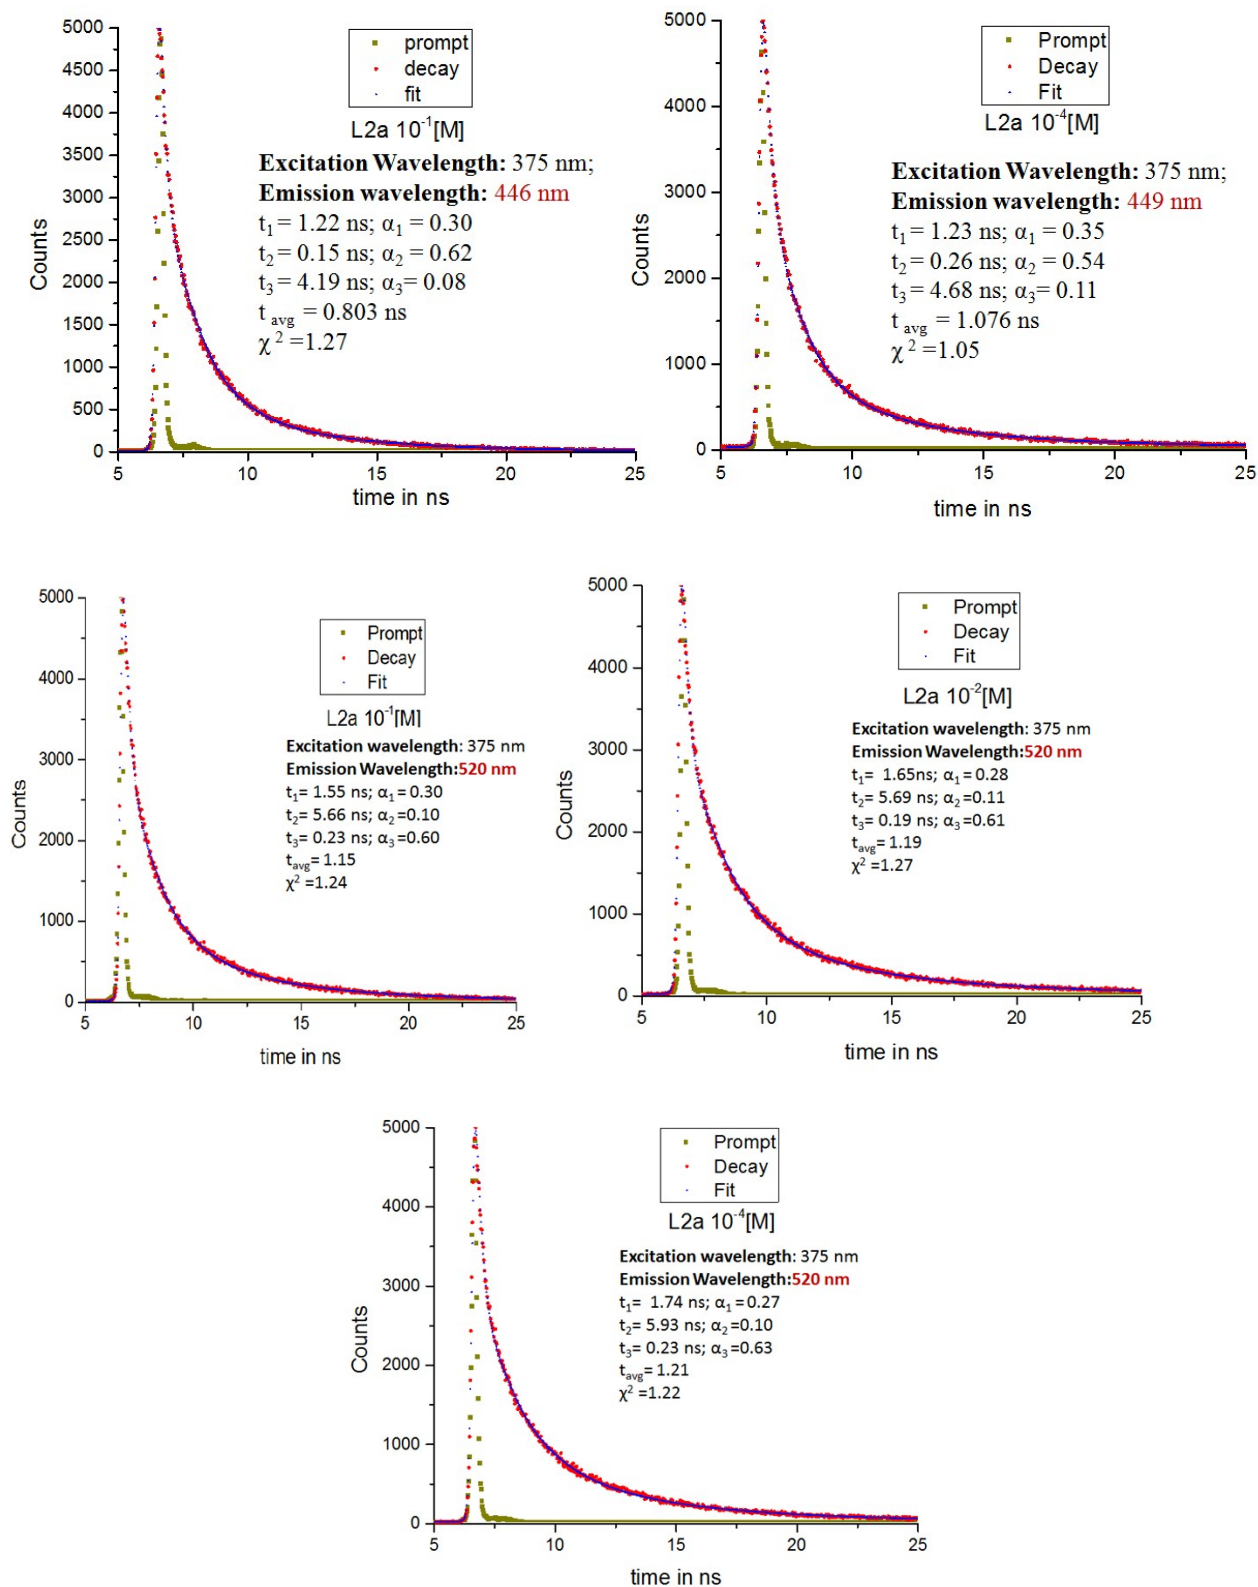

**Figure S47:** TCSPC decay profiles of **L2b** in different concentration in MeOH with excitation at 375 nm

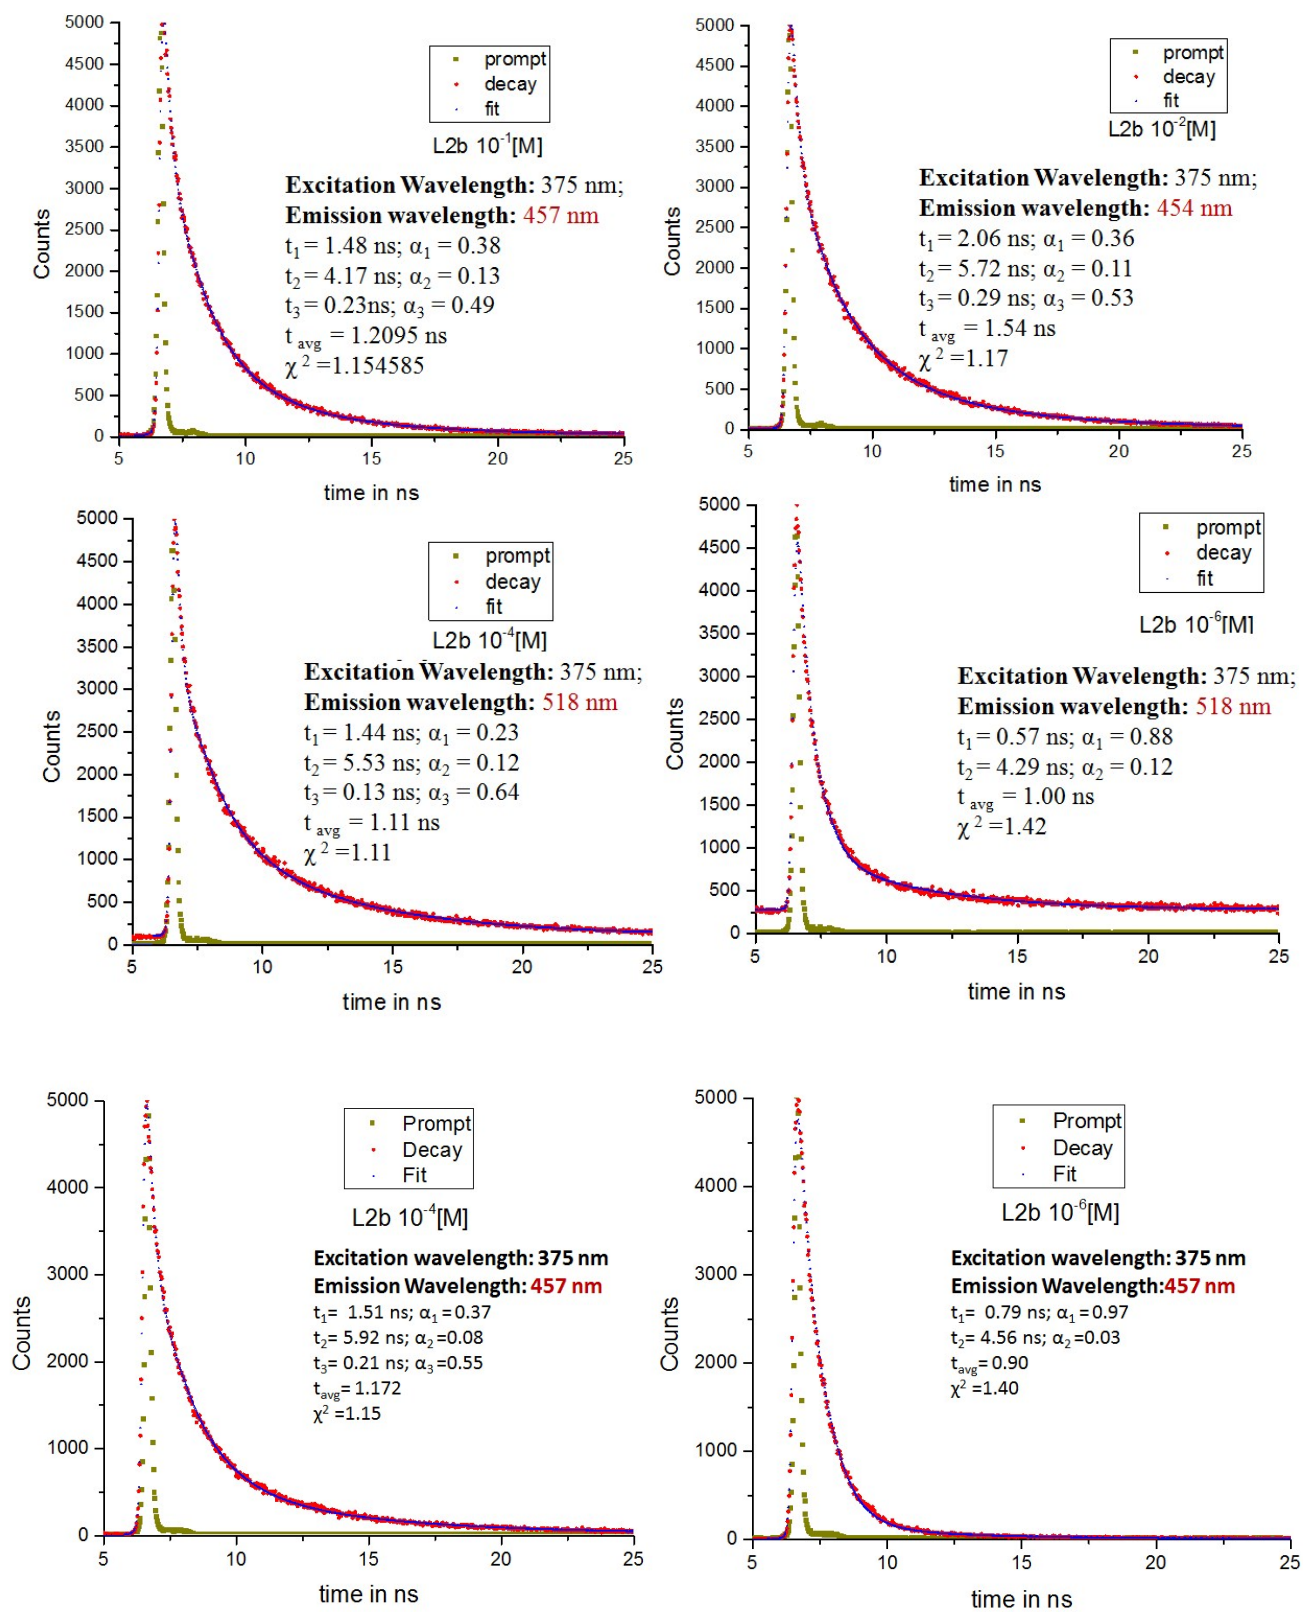

**Figure S48:** TCSPC decay profiles of **L3a** in different concentration in MeOH with excitation at 375 nm

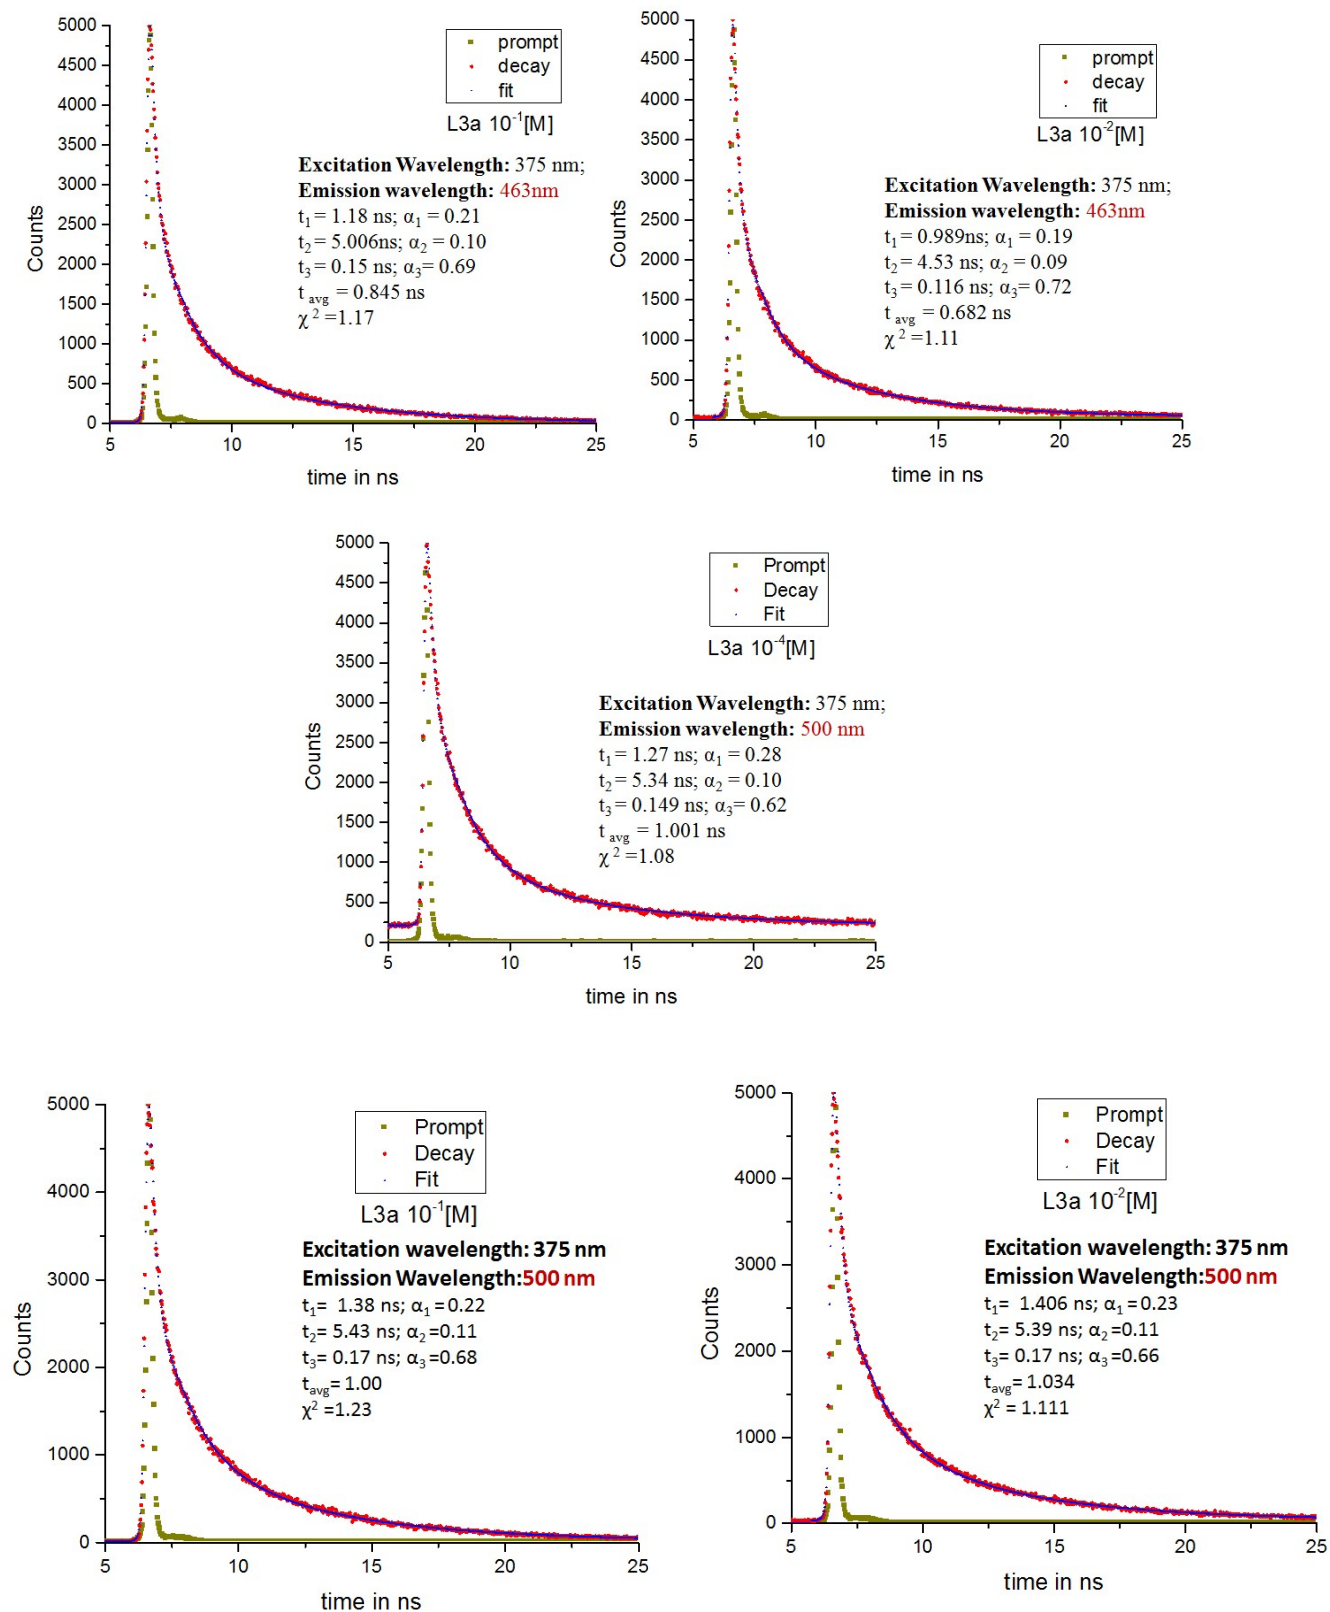

**Figure S49:** TCSPC decay profiles of **L3b** in different concentration in MeOH with excitation at 375 nm

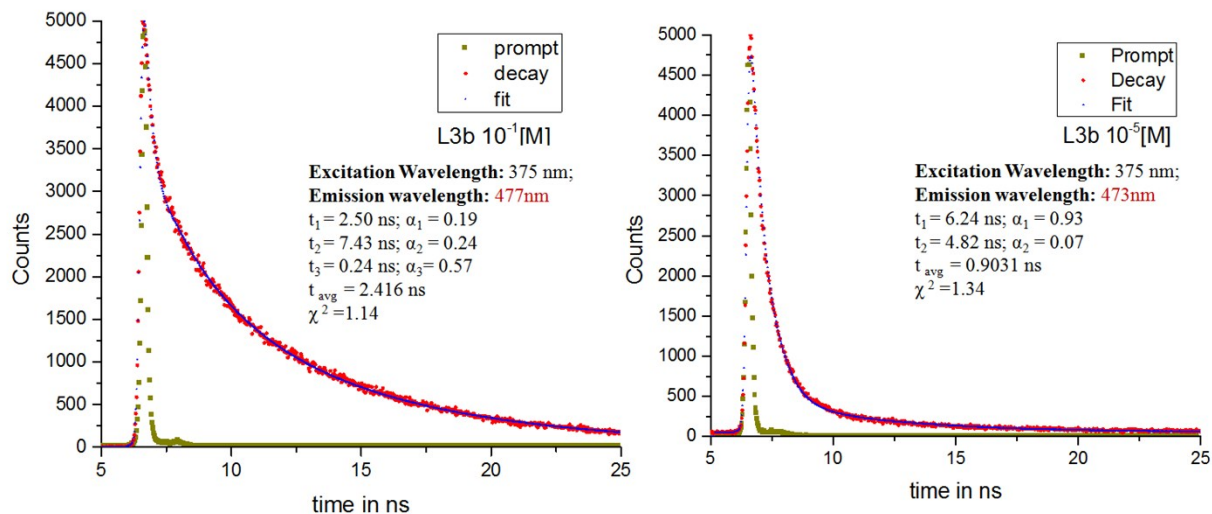

**Figure S50:** TCSPC decay profiles of **L4a** in different concentration in MeOH with excitation at 375 nm

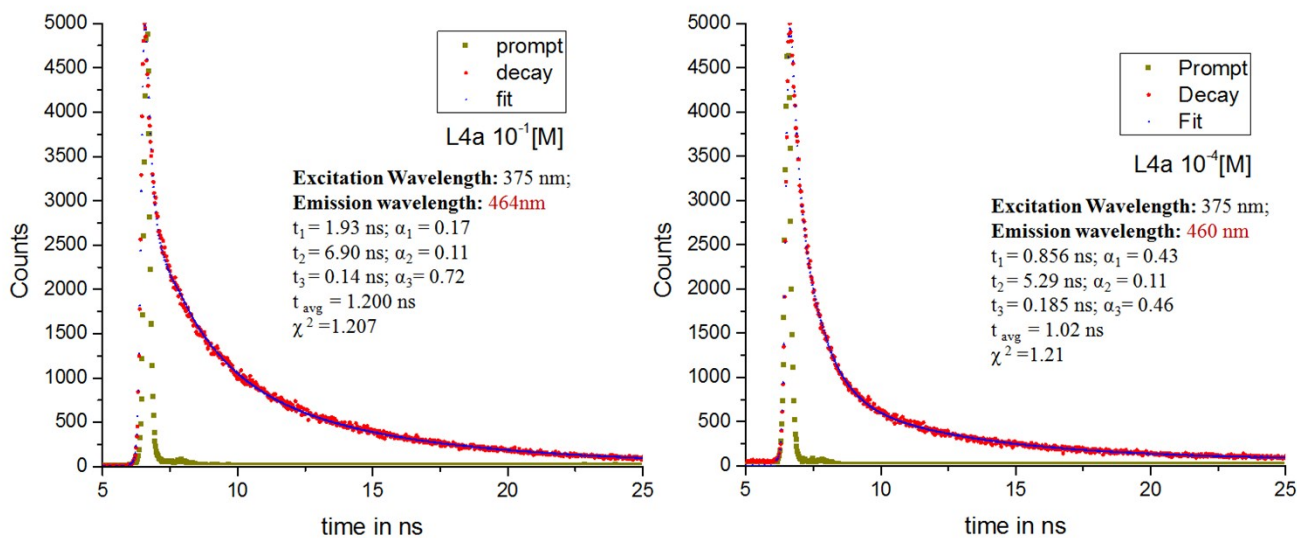



**Figure S51:** TCSPC decay profiles of **L4b** in different concentration in MeOH with excitation at 375

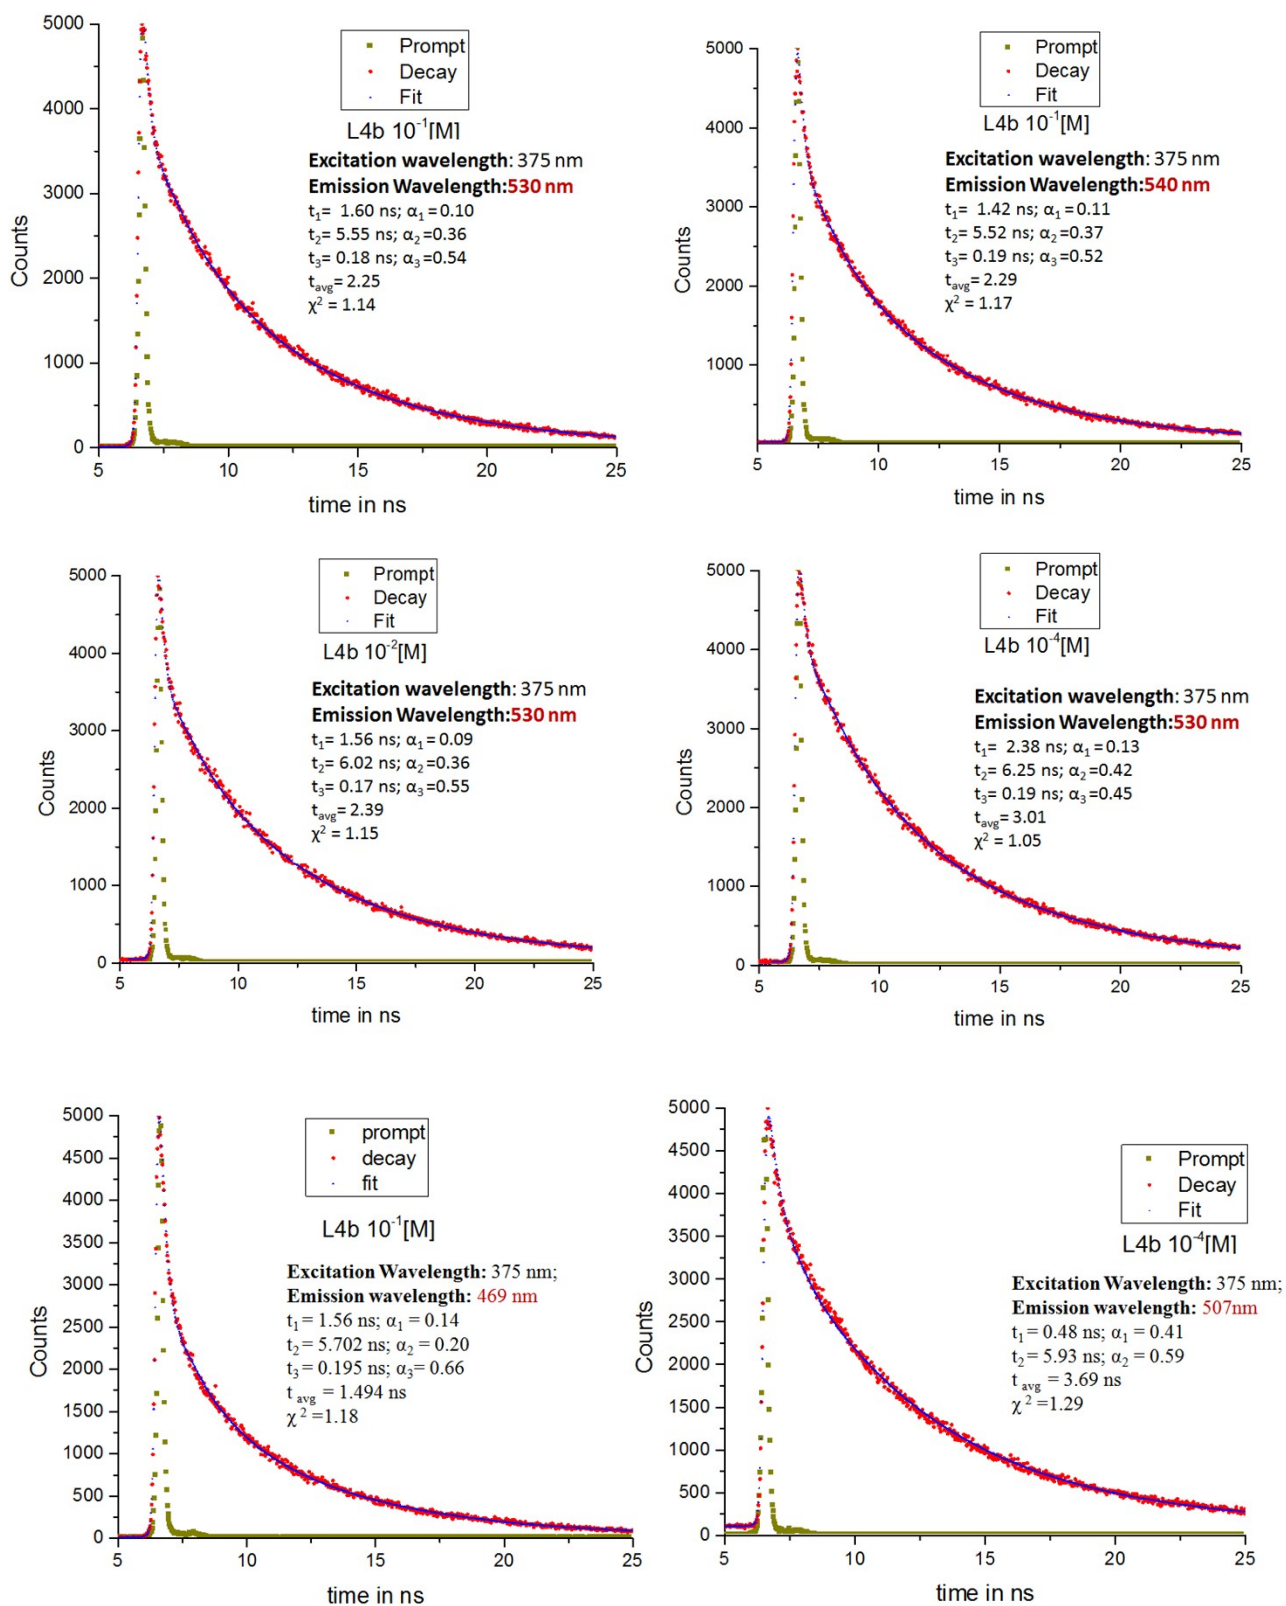

**Table S3:** Fluorescence lifetime data for **L2a**, **L2b**, **L3a**, **L3b**, **L4a** and **4b**

| Excitation Wavelength = 375nm           | $\tau_1$ (ns)            | $\tau_2$ (ns)           | $\tau_3$ (ns)           | $\tau_{avg}$ (ns)       |
|-----------------------------------------|--------------------------|-------------------------|-------------------------|-------------------------|
| <b>L2a</b>                              |                          |                         |                         |                         |
| $10^{-1}M$ ; $\lambda_{Emission}$ 520nm | 1.55 ( $\alpha_1$ 0.30)  | 5.66 ( $\alpha_2$ 0.10) | 0.23 ( $\alpha_3$ 0.60) | 1.15 ( $\chi^2$ 1.24)   |
| $10^{-1}M$ ; $\lambda_{Emission}$ 446nm | 1.22 ( $\alpha_1$ 0.30)  | 0.15 ( $\alpha_2$ 0.62) | 4.19 ( $\alpha_3$ 0.08) | 0.803 ( $\chi^2$ 1.27)  |
| $10^{-2}M$ ; $\lambda_{Emission}$ 520nm | 1.65 ( $\alpha_1$ 0.28)  | 5.69 ( $\alpha_2$ 0.11) | 0.19 ( $\alpha_3$ 0.61) | 1.19 ( $\chi^2$ 1.27)   |
| $10^{-4}M$ ; $\lambda_{Emission}$ 520nm | 1.74 ( $\alpha_1$ 0.27)  | 5.93 ( $\alpha_2$ 0.10) | 0.23 ( $\alpha_3$ 0.63) | 1.21 ( $\chi^2$ 1.22)   |
| $10^{-4}M$ ; $\lambda_{Emission}$ 449nm | 1.23 ( $\alpha_1$ 0.35)  | 0.26 ( $\alpha_2$ 0.54) | 4.69 ( $\alpha_3$ 0.11) | 1.076 ( $\chi^2$ 1.05)  |
| <b>L2b</b>                              |                          |                         |                         |                         |
| $10^{-1}M$ ; $\lambda_{Emission}$ 457nm | 1.48 ( $\alpha_1$ 0.38)  | 4.17 ( $\alpha_2$ 0.13) | 0.23 ( $\alpha_3$ 0.49) | 1.209 ( $\chi^2$ 1.15)  |
| $10^{-2}M$ ; $\lambda_{Emission}$ 454nm | 2.06 ( $\alpha_1$ 0.36)  | 5.72 ( $\alpha_2$ 0.11) | 0.29 ( $\alpha_3$ 0.53) | 1.540 ( $\chi^2$ 1.17)  |
| $10^{-4}M$ ; $\lambda_{Emission}$ 518nm | 1.45 ( $\alpha_1$ 0.23)  | 5.53 ( $\alpha_2$ 0.12) | 0.13 ( $\alpha_3$ 0.64) | 1.110 ( $\chi^2$ 1.11)  |
| $10^{-4}M$ ; $\lambda_{Emission}$ 457nm | 1.51 ( $\alpha_1$ 0.37)  | 5.92 ( $\alpha_2$ 0.08) | 0.21 ( $\alpha_3$ 0.55) | 1.172 ( $\chi^2$ 1.15)  |
| $10^{-6}M$ ; $\lambda_{Emission}$ 518nm | 0.57 ( $\alpha_1$ 0.88)  | 4.29 ( $\alpha_2$ 0.12) | ----                    | 1.001 ( $\chi^2$ 1.42)  |
| $10^{-6}M$ ; $\lambda_{Emission}$ 457nm | 0.79 ( $\alpha_1$ 0.97)  | 4.56 ( $\alpha_2$ 0.03) | ----                    | 0.90 ( $\chi^2$ 1.40)   |
| $10^{-6}M$ ; $\lambda_{Emission}$ 457nm | 0.33 ( $\alpha_1$ 0.38)  | 0.95 ( $\alpha_2$ 0.61) | 5.87 ( $\alpha_3$ 0.01) | 0.79 ( $\chi^2$ 1.15)   |
| <b>L3a</b>                              |                          |                         |                         |                         |
| $10^{-1}M$ ; $\lambda_{Emission}$ 500nm | 1.38 ( $\alpha_1$ 0.22)  | 5.43 ( $\alpha_2$ 0.11) | 0.17 ( $\alpha_3$ 0.68) | 1.00 ( $\chi^2$ 1.23)   |
| $10^{-1}M$ ; $\lambda_{Emission}$ 463nm | 1.19 ( $\alpha_1$ 0.21)  | 5.01 ( $\alpha_2$ 0.10) | 0.15 ( $\alpha_3$ 0.69) | 0.845 ( $\chi^2$ 1.17)  |
| $10^{-2}M$ ; $\lambda_{Emission}$ 500nm | 1.406 ( $\alpha_1$ 0.23) | 5.39 ( $\alpha_2$ 0.11) | 0.17 ( $\alpha_3$ 0.66) | 1.034 ( $\chi^2$ 1.111) |
| $10^{-2}M$ ; $\lambda_{Emission}$ 463nm | 0.99 ( $\alpha_1$ 0.19)  | 4.53 ( $\alpha_2$ 0.09) | 0.12 ( $\alpha_3$ 0.72) | 0.682 ( $\chi^2$ 1.11)  |
| $10^{-4}M$ ; $\lambda_{Emission}$ 500nm | 1.28 ( $\alpha_1$ 0.28)  | 5.34 ( $\alpha_2$ 0.10) | 0.15 ( $\alpha_3$ 0.62) | 1.001 ( $\chi^2$ 1.08)  |
| <b>L3b</b>                              |                          |                         |                         |                         |
| $10^{-1}M$ ; $\lambda_{Emission}$ 477nm | 2.50 ( $\alpha_1$ 0.19)  | 7.43 ( $\alpha_2$ 0.24) | 0.24 ( $\alpha_3$ 0.57) | 2.416 ( $\chi^2$ 1.14)  |
| $10^{-5}M$ ; $\lambda_{Emission}$ 473nm | 6.24 ( $\alpha_1$ 0.93)  | 4.83 ( $\alpha_2$ 0.07) | ----                    | 0.903 ( $\chi^2$ 1.34)  |
| <b>L4a</b>                              |                          |                         |                         |                         |
| $10^{-1}M$ ; $\lambda_{Emission}$ 464nm | 1.93 ( $\alpha_1$ 0.17)  | 6.90 ( $\alpha_2$ 0.11) | 0.15 ( $\alpha_3$ 0.72) | 1.201 ( $\chi^2$ 1.20)  |
| $10^{-4}M$ ; $\lambda_{Emission}$ 460nm | 0.86 ( $\alpha_1$ 0.43)  | 5.29 ( $\alpha_2$ 0.11) | 0.19 ( $\alpha_3$ 0.46) | 1.021 ( $\chi^2$ 1.21)  |
| <b>L4b</b>                              |                          |                         |                         |                         |
| $10^{-1}M$ ; $\lambda_{Emission}$ 540nm | 1.42 ( $\alpha_1$ 0.11)  | 5.52 ( $\alpha_2$ 0.37) | 0.19 ( $\alpha_3$ 0.52) | 2.29 ( $\chi^2$ 1.17)   |
| $10^{-1}M$ ; $\lambda_{Emission}$ 469nm | 1.57 ( $\alpha_1$ 0.14)  | 5.70 ( $\alpha_2$ 0.20) | 0.19 ( $\alpha_3$ 0.66) | 1.495 ( $\chi^2$ 1.18)  |
| $10^{-1}M$ ; $\lambda_{Emission}$ 530nm | 1.60 ( $\alpha_1$ 0.10)  | 5.55 ( $\alpha_2$ 0.36) | 0.18 ( $\alpha_3$ 0.54) | 2.25 ( $\chi^2$ 1.14)   |
| $10^{-2}M$ ; $\lambda_{Emission}$ 530nm | 1.56 ( $\alpha_1$ 0.09)  | 6.02 ( $\alpha_2$ 0.36) | 0.17 ( $\alpha_3$ 0.55) | 2.39 ( $\chi^2$ 1.15)   |
| $10^{-2}M$ ; $\lambda_{Emission}$ 530nm | 0.32 ( $\alpha_1$ 0.53)  | 5.8 ( $\alpha_2$ 0.47)  | ----                    | 2.90 ( $\chi^2$ 1.33)   |
| $10^{-4}M$ ; $\lambda_{Emission}$ 530nm | 2.38 ( $\alpha_1$ 0.13)  | 6.25 ( $\alpha_2$ 0.42) | 0.19 ( $\alpha_3$ 0.45) | 3.01 ( $\chi^2$ 1.05)   |
| $10^{-4}M$ ; $\lambda_{Emission}$ 530nm | 0.432 ( $\alpha_1$ 0.41) | 5.84 ( $\alpha_2$ 0.59) | ----                    | 3.61 ( $\chi^2$ 1.33)   |
| $10^{-4}M$ ; $\lambda_{Emission}$ 507nm | 0.49 ( $\alpha_1$ 0.41)  | 5.94 ( $\alpha_2$ 0.59) | ----                    | 3.692 ( $\chi^2$ 1.29)  |

**Figure S52:**  $^1\text{H}$  NMR spectra of **L2b** in  $\text{CDCl}_3$  by changing the concentration of compound

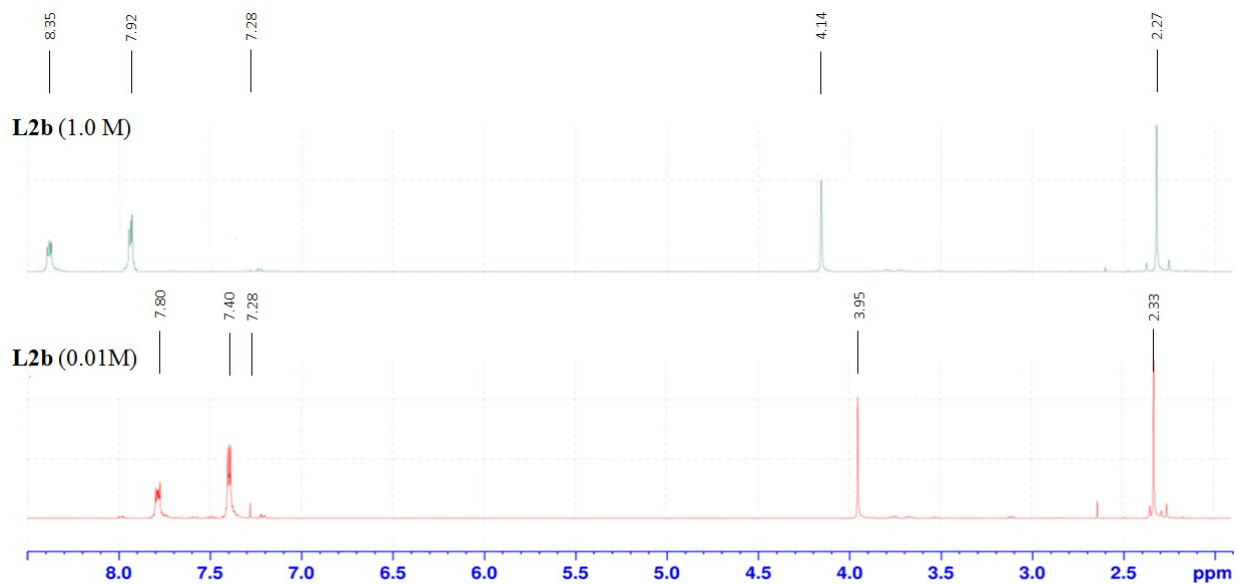

**Figure S53:**  $^1\text{H}$  NMR spectra of **L2d** in  $\text{CDCl}_3$  by changing the concentration of compound

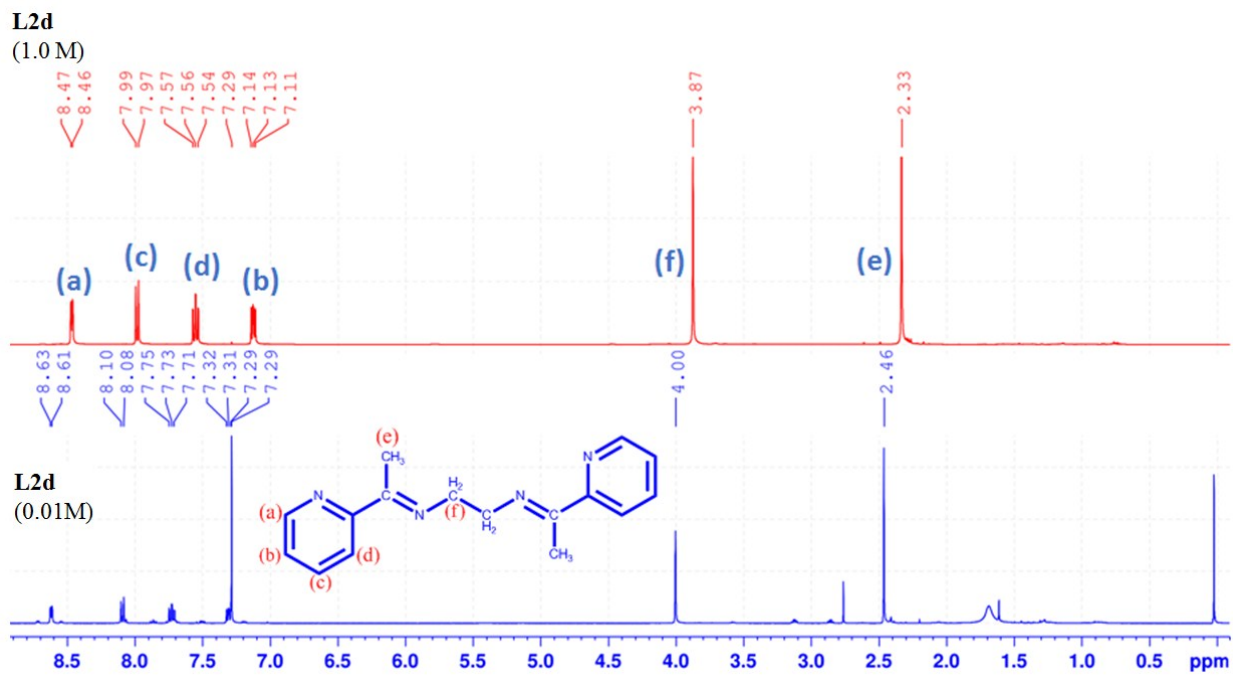

Supplement: c6ra08582b1.pdf [file c6ra08582b1.pdf]
